# Supplementary material for: Risk of Active Tuberculosis in HIV-Infected Patients in Taiwan with Free Access to HIV Care and a Positive T-Spot.TB Test
Source: PLoS One. 2015 May 4;10(5):e0125260. doi: 10.1371/journal.pone.0125260 (PMC4418700; doi:10.1371/journal.pone.0125260)
Supplement: S1 Data — (XLS) [file pone.0125260.s001.xls]

## Sheet: HIV_ELISPOT_Risk
ELISPOT date	included	Gender F	Count	Age	Age_10	Risk F	Results	Results II	Results III	Results IV	CD4 F	CD4<200	PVL F	PVL log	PVL>5	PVL<50	last FU date	Lost to FU	Death	FU date	FU Duration I	TB reported	Reporting date	ELISPOT_TB	Old TB	newly HIV Dx	Hospitalization	HAART ELISPOT	HAART Date	HAART final	PJP	active TB	O_Dis	Other Diseases	ELISPOT	CD4_ELISPOT	CD4_50	CD4 <200	PVL_ELISPOT	PVL log	PVL <50	PVL >5
2011-03-17	1	1	1	39	8		N	0	0	0	183	1	5290	3.72346	0	0	2011-05-05	0	0	2014-09-30	1293	0			0	1	1	0	2011-04-14	1	1	0			2011-03-17	60	2	1	403000	5.60531	0	1
2011-11-10	1	1	1	38	8		N	0	0	0	620	0	20	1.30103	0	1	2014-06-10	0	0	2014-09-30	1055	0			0	0	0	1		1	0	0			2011-11-10	426	9	0	334	2.52375	0	0
2012-04-12	1	1	1	34	7		N	0	0	0	347	0	7610	3.88138	0	0	2014-08-02	0	0	2014-09-30	901	0			0	0	0	0		1	0	0			2012-04-12	347	7	0	7610	3.88138	0	0
2011-10-19	1	1	1	45	9		N	0	0	0	353	0	20	1.30103	0	1	2014-06-03	0	0	2014-09-30	1077	0			0	0	0	1		1	0	0			2011-10-19	369	8	0	40	1.60206	1	0
2012-02-09	1	1	1	42	9		N	0	0	0	505	0	20	1.30103	0	1	2014-08-07	0	0	2014-09-30	964	0			0	0	0	1		1	0	0			2012-02-09	606	13	0	40	1.60206	1	0
2012-03-27	1	1	1	32	7		N	0	0	0	688	0	20	1.30103	0	1	2014-05-15	0	0	2014-09-30	917	0			0	0	0	1		1	0	0			2012-03-27	613	13	0	40	1.60206	1	0
2012-03-22	1	1	1	27	6	1	N	0	0	0	601	0	20	1.30103	0	1	2014-06-21	0	0	2014-09-30	922	0			0	0	0	1		1	0	0			2012-03-22	442	9	0	40	1.60206	1	0
2012-05-10	1	1	1	33	7		N	0	0	0	397	0	429	2.63246	0	0	2014-07-24	0	0	2014-09-30	873	0			0	0	0	0	2014-05-15	1	0	0			2012-05-10	342	7	0	23200	4.36549	0	0
2011-07-12	1	1	1	23	5		N	0	0	0	838	0	20	1.30103	0	1	2014-08-02	0	0	2014-09-30	1176	0	2011/7/21(excluded)		0	0	0	1		1	0	0			2011-07-12	198	4	1	40	1.60206	1	0
2012-03-06	1	1	1	27	6	1	N	0	0	0	487	0	20	1.30103	0	1	2014-07-03	0	0	2014-09-30	938	0			0	0	0	1		1	0	0			2012-03-06	705	15	0	40	1.60206	1	0
2012-03-20	1	1	1	32	7		N	0	0	0	302	0	20	1.30103	0	1	2014-07-24	0	0	2014-09-30	924	0			0	0	0	1		1	0	0			2012-03-20	1109	23	0	40	1.60206	1	0
2012-01-05	1	1	1	37	8		N	0	0	0	125.454	1	3190	3.50379	0	0	2014-05-27	0	0	2014-09-30	999	0			0	1	1	0	1/16/2012	1	1	0	1		2012-01-05	64.0584	2	1	342000	5.53403	0	1
2012-01-05	1	1	1	30	6		N	0	0	0	34.7805	1	43100	4.63448	0	0	2014-05-13	0	0	2014-09-30	999	0			0	0	1	0		1	1	0	1	PCP	2012-01-05	23.166	1	1	220000	5.34242	0	1
2012-01-05	1	1	1	49	10	2	P	1	1	0	373.942	0	20	1.30103	0	1	2014-05-18	0	0	2014-09-30	999	1	2007-08-16	1603	1	0	0	1		1	0	0	0		2012-01-05	416.208	9	0	40	1.60206	1	0
2012-01-19	1	1	1	46	10		N	0	0	0	765	0	20	1.30103	0	1	2014-04-28	0	0	2014-09-30	985	0			0	0	0	1		1	0	0	0		2012-01-19	637.592	13	0	40	1.60206	1	0
2012-01-19	1	1	1	33	7	1	P	1	1	0	599.949	0	254	2.40483	0	0	2014-04-28	0	0	2014-09-30	985	0			0	0	0	1		1	0	0	0		2012-01-19	546.09	11	0	40	1.60206	1	0
2012-01-19	1	1	1	22	5	1	N	0	0	0	450.352	0	89	1.94939	0	0	2014-04-22	0	0	2014-09-30	985	0			0	0	0	1		1	0	0	0		2012-01-19	428.854	9	0	40	1.60206	1	0
2012-01-19	1	1	1	31	7		N	0	0	0	428.876	0	11500	4.0607	0	0	2014-06-28	0	0	2014-09-30	985	0			0	0	0	0		0	0	0	0		2012-01-19	405.709	9	0	10400	4.01703	0	0
2012-02-01	1	1	1	47	10	1	P	1	1	0	959.622	0	20	1.30103	0	1	2014-05-11	0	0	2014-09-30	972	0			0	0	0	1		1	0	0	0		2012-02-01	1069.24	22	0	40	1.60206	1	0
2012-02-01	1	1	1	44	9	2	N	0	0	0	270.908	0	85	1.92942	0	0	2014-05-11	0	0	2014-09-30	972	0			0	0	0	1		1	0	0	0		2012-02-01
2012-02-02	1	1	1	32	7		N	0	0	0	114.14	1	283	2.45179	0	0	2014-07-08	0	0	2014-09-30	971	0			0	1	0	0	2/9/2012	1	0	0	0		2012-02-02	80.976	2	1	21800	4.33846	0	0
2012-02-02	1	1	1	31	7		N	0	0	0	572.22	0	20	1.30103	0	1	2014-05-24	0	0	2014-09-30	971	0			0	0	0	1		1	0	0	0		2012-02-02	459.56	10	0	40	1.60206	1	0
2012-02-02	1	1	1	32	7		N	0	0	0	462.046	0	29000	4.4624	0	0	2014-05-27	0	0	2014-09-30	971	0			0	0	0	0		0	0	0	0		2012-02-02	450.377	9	0	8780	3.94349	0	0
2012-02-07	1	1	1	42	9	1	N	0	0	0	352.032	0	20	1.30103	0	1	2014-05-18	0	0	2014-09-30	966	0			0	0	0	1		1	0	0	0		2012-02-07	316.768	7	0	40	1.60206	1	0
2012-02-07	1	1	1	36	8		N	0	0	0	401.568	0	21100	4.32428	0	0	2014-04-23	0	0	2014-09-30	966	0			0	0	0	0		0	0	0	0		2012-02-07	1735.77	35	0	9980	3.99913	0	0
2012-02-07	1	1	1	59	12	1	N	0	0	0	547.536	0	20	1.30103	0	1	2014-06-11	0	0	2014-09-30	966	1	2000-12-29	4057	1	0	0	1		1	0	0	0		2012-02-07	633.093	13	0	102	2.0086	0	0
2012-02-08	1	1	1	39	8		N	0	0	0	592.74	0	1780	3.25042	0	0	2014-05-06	0	0	2014-09-30	965	0			0	0	0	0		0	0	0	0		2012-02-08	644.403	13	0	2660	3.42488	0	0
2012-02-08	1	1	1	39	8	1	N	0	0	0	465.638	0	20	1.30103	0	1	2014-05-18	0	0	2014-09-30	965	0			0	0	1	1		1	0	0	1	Community-acquired pneumonia	2012-02-08
2012-02-08	1	1	1	45	9	1	N	0	0	0	170	1	1250000	6.09691	1	0	2012-02-23	0	1	2014-09-30	15	0			0	0	1	0	2/16/2012	1	1	0	1		2012-02-08	169.88	4	1	1250000	6.09691	0	1
2012-02-08	1	1	1	28	6		N	0	0	0	240.115	0	81200	4.90956	0	0	2014-06-27	0	0	2014-09-30	965	0			0	0	0	0		1	0	0	0		2012-02-08	240.115	5	0	81200	4.90956	0	0
2012-02-08	1	1	1	25	5	1	N	0	0	0	439.396	0	39600	4.5977	0	0	2013-02-08	1	2	2014-09-30	965	0			0	0	0	0		0	0	0	0		2012-02-08	514.08	11	0	21500	4.33244	0	0
2012-02-08	1	1	1	32	7		N	0	0	0	399.206	0	30900	4.48996	0	0	2014-04-23	0	0	2014-09-30	965	0			0	0	0	0		1	0	0	0		2012-02-08	335.858	7	0	55000	4.74036	0	0
2012-02-08	1	1	1	29	6		N	0	0	0	133.657	1	5770	3.76118	0	0	2014-05-06	0	0	2014-09-30	965	0			0	1	1	0	2/9/2012	1	1	0	1	Pneumocystis jirovecii pneumonia	2012-02-08	27.9498	1	1	429000	5.63246	0	1
2012-02-08	1	1	1	27	6		N	0	0	0	576.334	0	1450	3.16137	0	0	2014-06-13	0	0	2014-09-30	965	0			0	1	0	0		1	0	0	0		2012-02-08	305.745	7	0	176000	5.24551	0	1
2012-02-09	1	1	1	29	6		N	0	0	0	490.985	0	20	1.30103	0	1	2014-06-13	0	0	2014-09-30	964	0			0	0	0	1		1	0	0	0		2012-02-09	490.985	10	0	40	1.60206	1	0
2012-02-09	1	1	1	29	6		N	0	0	0	5.3088	1	218000	5.33846	1	0	2014-04-19	0	0	2014-09-30	964	0			0	1	1	1	1/31/2012	1	1	0	1	PJP	2012-02-09
2012-02-09	1	1	1	29	6	2	N	0	0	0	957.676	0	20	1.30103	0	1	2014-06-20	0	0	2014-09-30	964	0			0	0	0	1		1	0	0	0		2012-02-09	957.676	20	0	40	1.60206	1	0
2012-02-09	1	1	1	29	6		N	0	0	0	313.614	0	68600	4.83632	0	0	2014-05-20	0	0	2014-09-30	964	0			0	1	0	0		1	0	0	0		2012-02-09	300.995	7	0	92700	4.96708	0	0
2012-02-09	1	1	1	63	13		N	0	0	0	377.606	0	79	1.89763	0	0	2014-04-24	0	0	2014-09-30	964	0			0	0	0	1		1	0	0	0		2012-02-09	377.606	8	0	79	1.89763	0	0
2012-02-09	1	1	1	38	8		N	0	0	0	424.973	0	51400	4.71096	0	0	2014-05-27	0	0	2014-09-30	964	0			0	0	0	0		1	0	0	0		2012-02-09	916.48	19	0	64600	4.81023	0	0
2012-02-09	1	1	1	64	13		N	0	0	0	414	0	29	1.4624	0	1	2014-07-25	0	0	2014-09-30	964	0			0	0	1	1		1	0	0	1	pericardial effusion	2012-02-09
2012-02-09	1	1	1	73	15		N	0	0	0	177.48	1	20	1.30103	0	1	2012-05-16	1	2	2014-09-30	964	0			0	0	1	1		1	0	0	1	Right femoral neck fracture, status post ORIF; Recurrent aspiration pneumonia, MDRAB, MRSA infection related, improved	2012-02-09	177.48	4	1	40	1.60206	1	0
2012-02-09	1	1	1	59	12		N	0	0	0	214.2	0	20	1.30103	0	1	2014-05-13	0	0	2014-09-30	964	0			0	0	1	1		1	0	0	1	Metabolic acidosis with shock and acute kidney injury, suspected drug related, suspected infection related	2012-02-09	250.982	6	0
2012-02-09	1	1	1	32	7		N	0	0	0	68.5308	1	20	1.30103	0	1	2014-05-13	0	0	2014-09-30	964	0			0	1	1	1		1	1	0	1	PJP	2012-02-09	24.7744	1	1	133	2.12385	0	0
2012-02-09	1	1	1	40	8	1	N	0	0	0	448.637	0	20	1.30103	0	1	2014-07-08	0	0	2014-09-30	964	0			0	0	0	1		1	0	0	0		2012-02-09	448.637	9	0	40	1.60206	1	0
2012-02-13	1	1	1	58	12		N	0	0	0	104.595	1	528	2.72263	0	0	2013-01-18	1	2	2014-09-30	960	0			0	1	1	0	2/23/2012	1	1	0	1		2012-02-13	14.4649	1	1	40	1.60206	1	0
2012-02-13	0	1	1	24	5	1	P	1	1	0	545.962	0	20	1.30103	0	1	2014-06-25	0	0	2014-09-30	960	1	2012-02-14	-1	0	0	1	1	2/10/2012	1	0	1	0		2012-02-13	545.962	11	0	142000	5.15229	0	1
2012-02-13	1	1	1	29	6		N	0	0	0	379.863	0	93300	4.96988	0	0	2014-06-20	0	0	2014-09-30	960	0			0	0	0	0	6/27/2013	1	0	0	0		2012-02-13	429.151	9	0	40	1.60206	1	0
2012-02-14	1	1	1	38	8		N	0	0	0	460.321	0	64	1.80618	0	0	2014-06-11	0	0	2014-09-30	959	0			0	0	0	1		1	0	0	0		2012-02-14	527.122	11	0	40	1.60206	1	0
2012-02-14	1	1	1	49	10	1	P	1	1	0	1376.1	0	20	1.30103	0	1	2014-05-04	0	0	2014-09-30	959	1	2000-02-19	4378	1	0	0	1		1	0	0	0		2012-02-14	1376.1	27	0	40	1.60206	1	0
2012-02-14	1	0	1	46	10	2	N	0	0	0	1061.67	0	20	1.30103	0	1	2014-05-11	0	0	2014-09-30	959	0			0	0	0	1		1	0	0	0		2012-02-14	1233	25	0	40	1.60206	1	0
2012-02-14	1	1	1	42	9		N	0	0	0	428.454	0	40	1.60206	0	1	2014-05-11	0	0	2014-09-30	959	0			0	0	0	1		1	0	0	0		2012-02-14	112.784	3	1	40	1.60206	1	0
2012-02-14	1	1	1	41	9		N	0	0	0	437.065	0	40	1.60206	0	1	2014-06-18	0	0	2014-09-30	959	0			0	0	0	1		1	0	0	0		2012-02-14	437.065	9	0	2130	3.32838	0	0
2012-02-14	1	1	1	42	9		N	0	0	0	511.695	0	860	2.9345	0	0	2014-07-02	0	0	2014-09-30	959	0			0	0	0	1		1	0	0	0		2012-02-14	276.48	6	0	40	1.60206	1	0
2012-02-14	1	1	1	47	10		N	0	0	0	415.051	0	20	1.30103	0	1	2014-05-11	0	0	2014-09-30	959	0			0	0	0	1		1	0	0	0		2012-02-14	525.899	11	0	1770000	6.24797	0	1
2012-02-14	1	1	1	22	5		N	0	0	0	36.6102	1	1770000	6.24797	1	0	2012-06-26	1	2	2014-09-30	959	0			0	0	1	1	2/10/2012	1	1	0	1		2012-02-14	36.6102	1	1	1890000	6.27646	0	1
2012-02-14	1	1	1	30	6		N	0	0	0	16.7142	1	149000	5.17319	1	0	2013-10-19	1	2	2014-09-30	959	0			0	0	1	0	2/16/2012	1	1	0	1	PJP	2012-02-14	19.7127	1	1	40	1.60206	1	0
2012-02-15	1	1	1	39	8	1	N	0	0	0	1377.95	0	40	1.60206	0	1	2014-04-09	0	0	2014-09-30	958	0			0	0	0	1		1	0	0	0		2012-02-15	1377.95	27	0	180	2.25527	0	0
2012-02-15	1	1	1	32	7		N	0	0	0	688.128	0	112	2.04922	0	0	2014-04-09	0	0	2014-09-30	958	0			0	0	0	0		1	0	0	0		2012-02-15	602.316	13	0	44500	4.64836	0	0
2012-02-15	1	1	1	26	6		N	0	0	0	416.171	0	58100	4.76418	0	0	2014-06-18	0	0	2014-09-30	958	0			0	0	0	0		1	0	0	0		2012-02-15	580.699	12	0	40	1.60206	1	0
2012-02-16	1	1	1	41	9	1	N	0	0	0	992.038	0	20	1.30103	0	1	2014-05-13	0	0	2014-09-30	957	0			0	0	0	1		1	0	0	0		2012-02-16	992.038	20	0	126	2.10037	0	0
2012-02-16	1	1	1	27	6	1	N	0	0	0	292.475	0	40	1.60206	0	1	2014-06-20	0	0	2014-09-30	957	0			0	0	0	1		1	0	0	0		2012-02-16	491.759	10	0	40	1.60206	1	0
2012-02-16	1	1	1	49	10	1	P	1	1	0	980.784	0	20	1.30103	0	1	2014-05-20	0	0	2014-09-30	957	0			0	0	0	1		1	0	0	0		2012-02-16	1188.77	24	0	40	1.60206	1	0
2012-02-16	1	1	1	34	7	1	N	0	0	0	642.418	0	20	1.30103	0	1	2014-04-28	0	0	2014-09-30	957	0			0	0	0	1		1	0	0	0		2012-02-16	755.479	16	0	45	1.65321	1	0
2012-02-16	1	1	1	38	8		N	0	0	0	1004.54	0	53	1.72428	0	0	2014-06-27	0	0	2014-09-30	957	0			0	0	0	1		1	0	0	0		2012-02-16	1711.96	34	0	12500	4.09691	0	0
2012-02-16	1	1	1	48	10	2	N	0	0	0	293	0	12500	4.09691	0	0	2013-03-26	0	1	2014-09-30	404	0			0	0	0	1		1	0	0	0		2012-02-16	293.37	6	0	84800	4.9284	0	0
2012-02-16	1	1	1	29	6		N	0	0	0	416.052	0	422000	5.62531	1	0	2013-06-15	1	2	2014-09-30	957	0			0	0	0	0		1	0	0	0		2012-02-16	441.64	9	0	40	1.60206	1	0
2012-02-16	1	1	1	33	7		N	0	0	0	535.937	0	40	1.60206	0	1	2014-06-25	0	0	2014-09-30	957	0			0	0	0	1		1	0	0	0		2012-02-16	422.4	9	0	40	1.60206	1	0
2012-02-16	1	1	1	35	7		N	0	0	0	358.673	0	20	1.30103	0	1	2014-06-12	0	0	2014-09-30	957	0			0	0	0	1		1	0	0	0		2012-02-16	364.705	8	0	3670	3.56467	0	0
2012-02-16	1	1	1	47	10	1	N	0	0	0	465.36	0	124	2.09342	0	0	2014-06-06	0	0	2014-09-30	957	0			0	0	0	1		1	0	0	0		2012-02-16	469.026	10	0	111000	5.04532	0	1
2012-02-16	1	1	1	30	6		N	0	0	0	452.566	0	161000	5.20683	1	0	2014-07-07	0	0	2014-09-30	957	0			0	0	0	0		1	0	0	0		2012-02-16	374.052	8	0	40	1.60206	1	0
2012-02-16	1	1	1	24	5	1	P	1	1	0	325.87	0	20	1.30103	0	1	2012-09-20	1	2	2014-09-30	957	0			0	0	0	1		1	0	0	0		2012-02-16	539.55	11	0	40	1.60206	1	0
2012-02-16	1	1	1	36	8	1	N	0	0	0	701.04	0	20	1.30103	0	1	2014-05-27	0	0	2014-09-30	957	0			0	0	0	1		1	0	0	0		2012-02-16	503.798	11	0	40	1.60206	1	0
2012-02-16	1	1	1	24	5	1	N	0	0	0	869.115	0	40	1.60206	0	1	2014-06-01	0	0	2014-09-30	957	0			0	0	0	1		1	0	0	0		2012-02-16	721.392	15	0	791	2.89818	0	0
2012-02-20	1	1	1	20	4	1	N	0	0	0	1001.73	0	11100	4.04532	0	0	2014-06-29	0	0	2014-09-30	953	0			0	0	0	0		0	0	0	0		2012-02-20	732.848	15	0	12800	4.10721	0	0
2012-02-20	1	1	1	21	5	1	N	0	0	0	623.938	0	17400	4.24055	0	0	2014-06-29	0	0	2014-09-30	953	0			0	0	0	0		0	0	0	0		2012-02-20	803.623	17	0	40	1.60206	1	0
2012-02-21	1	1	1	38	8	1	N	0	0	0	591.43	0	20	1.30103	0	1	2014-06-25	0	0	2014-09-30	952	0			0	0	0	1		1	0	0	0		2012-02-21	338.504	7	0	41900	4.62221	0	0
2012-02-22	1	1	1	34	7		P	1	1	0	853.38	0	16300	4.21219	0	0	2014-05-27	0	0	2014-09-30	951	0			0	0	0	0		0	0	0	0		2012-02-22	686.556	14	0	278	2.44404	0	0
2012-02-22	1	1	1	32	7		N	0	0	0	385.514	0	300	2.47712	0	0	2014-04-16	0	0	2014-09-30	951	0			0	0	0	0		1	0	0	0		2012-02-22	646.088	13	0	40	1.60206	1	0
2012-02-23	1	1	1	39	8	1	N	0	0	0	612.612	0	20	1.30103	0	1	2014-06-20	0	0	2014-09-30	950	0			0	0	0	1		1	0	0	0		2012-02-23	612.612	13	0	15500	4.19033	0	0
2012-02-23	1	1	1	28	6	1	N	0	0	0	419.92	0	6230	3.79449	0	0	2014-04-16	0	0	2014-09-30	950	0			0	0	0	0		1	0	0	0		2012-02-23	492	10	0	11900	4.07555	0	0
2012-02-29	1	1	1	26	6	1	N	0	0	0	249.421	0	10300	4.01284	0	0	2014-04-04	0	0	2014-09-30	944	0			0	0	0	0		1	0	0	0		2012-02-29	263.038	6	0	57600	4.76042	0	0
2012-02-29	1	1	1	27	6	1	N	0	0	0	828.124	0	16300	4.21219	0	0	2014-05-27	0	0	2014-09-30	944	0			0	0	0	0		1	0	0	0		2012-02-29	665.987	14	0	32400	4.51055	0	0
2012-02-29	1	1	1	39	8		N	0	0	0	319.654	0	465	2.66745	0	0	2014-05-19	0	0	2014-09-30	944	0			0	1	0	0		1	0	0	0		2012-02-29	236.256	5	0	5190	3.71517	0	0
2012-03-01	1	1	1	35	7		N	0	0	0	990.495	0	5190	3.71517	0	0	2014-06-18	0	0	2014-09-30	943	0			0	0	0	0		1	0	0	0		2012-03-01	990.495	20	0	40	1.60206	1	0
2012-03-01	1	1	1	62	13	1	N	0	0	0	353.354	0	20	1.30103	0	1	2014-04-23	0	0	2014-09-30	943	0			0	0	0	1		1	0	0	0		2012-03-01	48.263	1	1	23600	4.37291	0	0
2012-03-06	1	1	1	25	5	1	N	0	0	0	623.019	0	25100	4.39967	0	0	2013-06-28	1	2	2014-09-30	938	0			0	0	0	0		0	0	0	0		2012-03-06	738.847	15	0	40	1.60206	1	0
2012-03-06	1	1	1	39	8		N	0	0	0	619.099	0	20	1.30103	0	1	2014-04-16	0	0	2014-09-30	938	0			0	0	0	1		1	0	0	0		2012-03-06	671.124	14	0	40	1.60206	1	0
2012-03-06	1	1	1	39	8		N	0	0	0	165.734	1	2040	3.30963	0	0	2014-07-01	0	0	2014-09-30	938	0			0	1	1	1		1	1	0	1		2012-03-06				1220000	6.08636	0	1
2012-03-06	1	1	1	23	5		N	0	0	0	62.16	1	1220000	6.08636	1	0	2014-06-13	0	0	2014-09-30	938	0			0	0	1	1		1	1	0	1		2012-03-06	62.16	2	1	160000	5.20412	0	1
2012-03-06	1	1	1	26	6	1	N	0	0	0	293.813	0	1930	3.28556	0	0	2012-06-19	1	2	2014-09-30	938	0			0	0	0	0		1	0	0	0		2012-03-06	257.443	6	0
2012-03-07	1	1	1	51	11		N	0	0	0	83.9553	1	NA				2012-05-17	1	2	2014-09-30	937	0			0	0	1	1		1	0	0	1	KS; lymphoma; pneumococcus	2012-03-07	73.777	2	1	40	1.60206	1	0
2012-03-07	1	1	1	59	12	2	N	0	0	0	149.856	1	20	1.30103	0	1	2014-06-11	0	0	2014-09-30	937	0			0	0	0	1		1	0	0	0		2012-03-07	127.082	3	1	6540	3.81558	0	0
2012-03-07	1	1	1	31	7		N	0	0	0	551.388	0	6540	3.81558	0	0	2014-06-15	0	0	2014-09-30	937	0			0	0	0	0		0	0	0	0		2012-03-07	638.405	13	0	1540	3.18752	0	0
2012-03-08	1	1	1	23	5		N	0	0	0	357.21	0	988	2.99476	0	0	2014-06-20	0	0	2014-09-30	936	0			0	0	0	0		0	0	0	0		2012-03-08	323.125	7	0	158000	5.19866	0	1
2012-03-08	1	1	1	30	6		N	0	0	0	133.294	1	158000	5.19866	1	0	2012-03-14	0	1	2014-09-30	6	0			0	0	1	0	8/16/2011	1	0	0	1	cholecystitis	2012-03-08	133.294	3	1	40	1.60206	1	0
2012-03-08	1	1	1	32	7	1	N	0	0	0	238.092	0	101000	5.00432	1	0	2014-04-23	0	0	2014-09-30	936	0			0	0	0	1		1	0	0	0		2012-03-08	497.334	10	0	96	1.98227	0	0
2012-03-08	1	1	1	33	7	1	N	0	0	0	551.426	0	40	1.60206	0	1	2014-04-21	0	0	2014-09-30	936	0			0	0	0	1		1	0	0	0		2012-03-08	471.184	10	0	2400	3.38021	0	0
2012-03-12	1	1	1	26	6	1	N	0	0	0	300.931	0	2830	3.45179	0	0	2014-04-29	0	0	2014-09-30	932	0			0	0	0	0		1	0	0	0		2012-03-12	294.127	6	0	309	2.48996	0	0
2012-03-13	1	1	1	30	6		N	0	0	0	14.464	1	309	2.48996	0	0	2014-06-13	0	0	2014-09-30	931	0			0	1	1	1		1	0	0	1	cryptococcosis	2012-03-13	14.464	1	1	1690	3.22789	0	0
2012-03-13	1	1	1	23	5	4	Indeterminate	2		1	11	1	278	2.44404	0	0	2012-05-22	0	1	2014-09-30	70	0			0	0	1	0	9/11/2006	1	0	0	1	progressive multifocal leukoencephalopathy (PML)	2012-03-13	0	1	1	1860000	6.26951	0	1
2012-03-13	1	1	1	47	10		N	0	0	0	246.385	0	5070	3.70501	0	0	2014-06-18	0	0	2014-09-30	931	0			0	1	1	0		1	0	0	1	headache	2012-03-13	141.9	3	1	40	1.60206	1	0
2012-03-13	1	1	1	32	7	1	N	0	0	0	326.508	0	20	1.30103	0	1	2014-04-21	0	0	2014-09-30	931	1	1999-10-08	4540	1	0	0	1		1	0	0	0		2012-03-13	320.42	7	0	40	1.60206	1	0
2012-03-15	1	1	1	42	9	1	N	0	0	0	640.32	0	20	1.30103	0	1	2014-05-27	0	0	2014-09-30	929	0			0	0	0	1		1	0	0	0		2012-03-15	640.32	13	0	40	1.60206	1	0
2012-03-15	1	1	1	36	8	1	N	0	0	0	716.329	0	20	1.30103	0	1	2014-05-13	0	0	2014-09-30	929	1	2003-12-03	3025	1	0	0	1		1	0	0	0		2012-03-15	716.329	15	0	40	1.60206	1	0
2012-03-15	1	1	1	43	9	1	N	0	0	0	787.114	0	20	1.30103	0	1	2014-04-23	0	0	2014-09-30	929	0			0	0	0	1		1	0	0	0		2012-03-15	787.114	16	0	40	1.60206	1	0
2012-03-19	1	1	1	52	11	1	N	0	0	0	270.022	0	20	1.30103	0	1	2014-04-24	0	0	2014-09-30	925	1	1998-09-14	4935	1	0	1	1		1	0	0	1	arthritis, bilateral knees, suspect reactive arthritis	2012-03-19	259.922	6	0	40	1.60206	1	0
2012-03-20	1	1	1	20	4	1	N	0	0	0	508.728	0	20	1.30103	0	1	2014-04-23	0	0	2014-09-30	924	0			0	0	0	1		1	0	0	0		2012-03-20	700.283	14	0	40	1.60206	1	0
2012-03-22	1	1	1	53	11	1	N	0	0	0	680.05	0	20	1.30103	0	1	2014-05-06	0	0	2014-09-30	922	0			0	0	0	1		1	0	0	0		2012-03-22	730.06	15	0	40	1.60206	1	0
2012-03-22	1	1	1	39	8	1	N	0	0	0	622.44	0	40	1.60206	0	1	2014-04-03	0	0	2014-09-30	922	0			0	0	0	1		1	0	0	0		2012-03-22	497.424	10	0	40	1.60206	1	0
2012-03-22	1	1	1	34	7		N	0	0	0	447.533	0	20	1.30103	0	1	2014-05-20	0	0	2014-09-30	922	0			0	0	0	1		1	0	0	0		2012-03-22	314.214	7	0	40	1.60206	1	0
2012-03-22	1	0	1	55	11	2	N	0	0	0	880.862	0	20	1.30103	0	1	2014-05-20	0	0	2014-09-30	922	1	1994-10-22	6361	1	0	0	1		1	0	0	0		2012-03-22	880.862	18	0	40	1.60206	1	0
2012-03-22	1	1	1	41	9		N	0	0	0	345.668	0	40	1.60206	0	1	2014-04-16	0	0	2014-09-30	922	0			0	0	0	1		1	0	0	1	old MAC LAP	2012-03-22	345.668	7	0	40	1.60206	1	0
2012-03-22	1	1	1	48	10	1	N	0	0	0	571.986	0	40	1.60206	0	1	2014-06-20	0	0	2014-09-30	922	0			0	0	0	1		1	0	0	0		2012-03-22	571.986	12	0	15900	4.2014	0	0
2012-03-22	1	1	1	27	6	1	N	0	0	0	782.13	0	4410	3.64444	0	0	2013-11-11	1	2	2014-09-30	922	0			0	0	0	0		0	0	0	0		2012-03-22	889.536	18	0	40	1.60206	1	0
2012-03-22	1	0	1	58	12	2	N	0	0	0	621.902	0	20	1.30103	0	1	2014-07-03	0	0	2014-09-30	922	0			0	0	0	1		1	0	0	0		2012-03-22	621.902	13	0	46	1.66276	1	0
2012-03-22	1	1	1	38	8		N	0	0	0	437.827	0	46	1.66276	0	1	2014-04-14	0	0	2014-09-30	922	0			0	0	0	1		1	0	0	0		2012-03-22	437.827	9	0	2670	3.42651	0	0
2012-03-22	1	1	1	38	8	3	N	0	0	0	617.613	0	7350	3.86629	0	0	2014-04-16	0	0	2014-09-30	922	0			0	0	0	1		1	0	0	0		2012-03-22	527.763	11	0	195	2.29003	0	0
2012-03-22	1	1	1	26	6	1	N	0	0	0	492.768	0	143	2.15534	0	0	2014-05-19	0	0	2014-09-30	922	0			0	0	1	1		1	0	0	1	Nontyphoid Salmonella bacteremia	2012-03-22	481.096	10	0	167	2.22272	0	0
2012-03-22	1	1	1	43	9		N	0	0	0	105.183	1	42600	4.62941	0	0	2014-06-25	0	0	2014-09-30	922	0			0	0	0	1		1	0	0	0		2012-03-22	143	3	1	40	1.60206	1	0
2012-03-22	1	0	1	52	11	2	N	0	0	0	350.698	0	20	1.30103	0	1	2014-06-20	0	0	2014-09-30	922	0			0	0	0	1		1	0	0	0		2012-03-22	389.612	8	0	47	1.6721	1	0
2012-03-22	1	1	1	48	10	1	N	0	0	0	662.435	0	40	1.60206	0	1	2014-04-16	0	0	2014-09-30	922	0			0	0	0	1		1	0	0	0		2012-03-22	700.806	15	0	40	1.60206	1	0
2012-03-22	1	1	1	36	8	1	N	0	0	0	529.729	0	40	1.60206	0	1	2014-05-06	0	0	2014-09-30	922	0			0	0	0	1		1	0	0	0		2012-03-22	1119.79	23	0	71	1.85126	0	0
2012-03-22	1	1	1	36	8	2	N	0	0	0	697.774	0	46	1.66276	0	1	2014-04-23	0	0	2014-09-30	922	0			0	0	0	1		1	0	0	0		2012-03-22	532.63	11	0	40	1.60206	1	0
2012-03-22	1	1	1	32	7	1	N	0	0	0	382.356	0	20	1.30103	0	1	2014-05-15	0	0	2014-09-30	922	0			0	0	0	1		1	0	0	0		2012-03-22	382.356	8	0	26600	4.42488	0	0
2012-03-26	1	1	1	41	9		P	1	1	0	357.42	0	452	2.65514	0	0	2014-07-09	0	0	2014-09-30	918	0			0	1	0	0	3/26/2012	1	0	0	0		2012-03-26	349.928	7	0	60600	4.78247	0	0
2012-03-26	1	1	1	31	7		N	0	0	0	372.54	0	43100	4.63448	0	0	2014-06-13	0	0	2014-09-30	918	0			0	0	0	0		1	0	0	0		2012-03-26	548.833	11	0	201	2.3032	0	0
2012-03-26	1	1	1	30	6		N	0	0	0	483.472	0	20	1.30103	0	1	2014-05-18	0	0	2014-09-30	918	0			0	0	0	1		1	0	0	0		2012-03-26	519.87	11	0	137	2.13672	0	0
2012-03-27	1	1	1	40	8		N	0	0	0	1237.13	0	20	1.30103	0	1	2014-04-18	0	0	2014-09-30	917	0			0	0	0	1		1	0	0	0		2012-03-27	363.569	8	0	40	1.60206	1	0
2012-03-27	1	1	1	27	6	1	N	0	0	0	462.739	0	8020	3.90417	0	0	2014-04-23	0	0	2014-09-30	917	0			0	0	0	0		1	0	0	0		2012-03-27	505.974	11	0	40	1.60206	1	0
2012-03-27	1	1	1	35	7	1	N	0	0	0	642.151	0	20	1.30103	0	1	2014-05-18	0	0	2014-09-30	917	0			0	0	0	1		1	0	0	0		2012-03-27	637.15	13	0	40	1.60206	1	0
2012-03-27	1	1	1	33	7		N	0	0	0	673.2	0	40	1.60206	0	1	2014-04-28	0	0	2014-09-30	917	0			0	0	0	1		1	0	0	0		2012-03-27	621.938	13	0	154000	5.18752	0	1
2012-03-27	1	1	1	20	4	1	N	0	0	0	226.627	0	173000	5.23805	1	0	2014-07-01	0	0	2014-09-30	917	0			0	0	0	1		1	0	0	0		2012-03-27	387.482	8	0	390000	5.59106	0	1
2012-03-28	1	1	1	27	6		N	0	0	0	4.767	1	6420	3.80754	0	0	2014-04-16	0	0	2014-09-30	916	0			0	0	0	0	4/5/2012	1	0	0	0		2012-03-28	21.4812	1	1	198000	5.29667	0	1
2012-03-28	0	1	1	38	8		P	1	1	0	399.063	0	463	2.66558	0	0	2014-06-11	0	0	2014-09-30	916	1	2012-03-28	0	0	1	1	0	4/11/2012	1	0	1	0		2012-03-28	57.42	2	1	40	1.60206	1	0
2012-03-29	1	1	1	53	11	2	N	0	0	0	272.113	0	40	1.60206	0	1	2014-06-26	0	0	2014-09-30	915	0			0	0	0	1		1	0	0	0		2012-03-29	272.113	6	0	40	1.60206	1	0
2012-03-29	1	0	1	50	10	2	N	0	0	0	608.805	0	20	1.30103	0	1	2014-07-08	0	0	2014-09-30	915	1	2001-03-21	4026	1	0	0	1		1	0	0	0		2012-03-29	501.84	11	0
2012-03-29	1	1	1	32	7		Indeterminate	2		1	121	1	40	1.60206	0	1	2012-12-12	0	1	2014-09-30	258	0			0	0	0	1		1	0	0	1	Mycobacterium avium complex infection, disseminated	2012-03-29				40	1.60206	1	0
2012-03-29	1	1	1	39	8	1	P	1	1	0	157.92	1	40	1.60206	0	1	2014-05-26	0	0	2014-09-30	915	0			0	0	0	1		1	0	0	0		2012-03-29	157.92	4	1	40	1.60206	1	0
2012-03-29	1	1	1	44	9	1	N	0	0	0	64.86	1	166000	5.22011	1	0	2014-07-01	0	0	2014-09-30	915	0			0	0	0	1		1	0	0	0		2012-03-29	534.6	11	0	40	1.60206	1	0
2012-03-29	1	1	1	27	6	1	N	0	0	0	418.319	0	40	1.60206	0	1	2014-04-18	0	0	2014-09-30	915	0			0	0	0	1		1	0	0	0		2012-03-29	551.578	12	0	40	1.60206	1	0
2012-03-29	1	1	1	29	6	1	N	0	0	0	962.22	0	20	1.30103	0	1	2014-05-06	0	0	2014-09-30	915	0			0	0	0	1		1	0	0	0		2012-03-29	996.962	20	0
2012-03-13	1	1	1	41	9		P	1	1	0	304.848	0	40	1.60206	0	1	2014-04-28	0	0	2014-09-30	931	1	2010-05-05	678	1	0	0	1		1	0	0	0		2012-03-13				44	1.64345	1	0
2012-03-13	1	1	1	42	9		N	0	0	0	102.429	1	20	1.30103	0	1	2014-05-18	0	0	2014-09-30	931	0			0	1	1	1		1	1	0	1	cryptococcosis	2012-03-13	57.984	2	1	40	1.60206	1	0
2012-03-13	1	1	1	25	5	4	N	0	0	0	358.631	0	43	1.63347	0	1	2014-05-18	0	0	2014-09-30	931	0			0	0	0	1		1	0	0	0		2012-03-13	516.854	11	0	40	1.60206	1	0
2012-03-13	1	1	1	26	6	1	N	0	0	0	397.742	0	20	1.30103	0	1	2014-04-23	0	0	2014-09-30	931	0			0	0	0	1		1	0	0	0		2012-03-13	351.528	8	0	40	1.60206	1	0
2012-03-14	1	1	1	48	10	2	N	0	0	0	420.635	0	20	1.30103	0	1	2014-05-21	0	0	2014-09-30	930	0			0	0	1	1		1	0	0	1	stroke	2012-03-14	467.862	10	0	59500	4.77452	0	0
2012-03-14	1	1	1	22	5	1	N	0	0	0	380.946	0	22400	4.35025	0	0	2013-11-01	1	2	2014-09-30	930	0			0	0	0	0		0	0	0	0		2012-03-14	367.992	8	0	12400	4.09342	0	0
2012-03-14	1	1	1	23	5	1	N	0	0	0	201.411	0	3200	3.50515	0	0	2014-07-25	0	0	2014-09-30	930	0			0	0	0	0		0	0	0	0		2012-03-14	223.174	5	0	40	1.60206	1	0
2012-03-14	1	1	1	50	10		N	0	0	0	242.424	0	20	1.30103	0	1	2013-11-20	1	2	2014-09-30	930	1	2011-02-25	383	1	0	1	1		1	0	0	1	KS	2012-03-14	242.424	5	0	26500	4.42325	0	0
2012-03-14	1	1	1	54	11	1	N	0	0	0	0	1	66200	4.82086	0	0	2013-07-27	0	1	2014-09-30	500	0			0	0	1	1		1	0	0	1	Mycobacterium avium intracellulare complex	2012-03-14	0	1	1	40	1.60206	1	0
2012-03-15	1	1	1	42	9		N	0	0	0	285.918	0	20	1.30103	0	1	2014-07-03	0	0	2014-09-30	929	0			0	0	0	1		1	0	0	0		2012-03-15	166.443	4	1	89	1.94939	0	0
2012-03-15	1	1	1	36	8	1	N	0	0	0	391.49	0	40	1.60206	0	1	2014-04-04	0	0	2014-09-30	929	0			0	0	0	1		1	0	0	0		2012-03-15	257.003	6	0	40	1.60206	1	0
2012-03-15	1	1	1	41	9	2	N	0	0	0	610.05	0	20	1.30103	0	1	2014-07-10	0	0	2014-09-30	929	0			0	0	0	1		1	0	0	0		2012-03-15	401.474	9	0	40	1.60206	1	0
2012-03-15	1	1	1	63	13	1	N	0	0	0	879.062	0	20	1.30103	0	1	2014-07-10	0	0	2014-09-30	929	0			0	0	0	1		1	0	0	1		2012-03-15	879.062	18	0	15900	4.2014	0	0
2012-03-15	1	1	1	23	5	1	N	0	0	0	575.84	0	173	2.23805	0	0	2014-04-16	0	0	2014-09-30	929	0			0	0	0	1		1	0	0	0		2012-03-15	494.336	10	0	19600	4.29226	0	0
2012-03-15	1	1	1	37	8		N	0	0	0	473.206	0	47300	4.67486	0	0	2014-06-12	0	0	2014-09-30	929	0			0	0	0	0		1	0	0	0		2012-03-15	367.846	8	0	40	1.60206	1	0
2012-03-15	1	1	1	38	8		P	1	1	0	430.137	0	40	1.60206	0	1	2014-04-23	0	0	2014-09-30	929	1	2009-07-02	987	1	0	0	1		1	0	0	0		2012-03-15	430.137	9	0	40	1.60206	1	0
2012-03-15	1	1	1	42	9	1	N	0	0	0	428.74	0	40	1.60206	0	1	2014-06-11	0	0	2014-09-30	929	0			0	0	0	1		1	0	0	0		2012-03-15	428.74	9	0	92	1.96379	0	0
2012-03-15	1	1	1	32	7		N	0	0	0	321.574	0	92	1.96379	0	0	2014-04-29	0	0	2014-09-30	929	0			0	0	1	0	3/8/2012	1	0	0	1	Intestinal amebiasis; nontyphoid Salmonella bacteremia	2012-03-15	321.574	7	0	40	1.60206	1	0
2012-03-15	1	1	1	51	11		N	0	0	0	300.65	0	40	1.60206	0	1	2014-07-10	0	0	2014-09-30	929	0			0	0	0	1		1	0	0	0		2012-03-15	300.65	7	0	9950	3.99782	0	0
2012-03-15	1	1	1	28	6	1	N	0	0	0	452.417	0	8120	3.90956	0	0	2014-06-12	0	0	2014-09-30	929	0			0	0	0	0		1	0	0	0		2012-03-15	357.361	8	0
2012-03-29	1	1	1	46	10	2	N	0	0	0	645.593	0	20	1.30103	0	1	2014-06-20	0	0	2014-09-30	915	0			0	0	0	1		1	0	0	0		2012-03-29				40	1.60206	1	0
2012-03-29	1	1	1	69	14	1	P	1	1	0	327.413	0	40	1.60206	0	1	2014-04-28	0	0	2014-09-30	915	0			0	0	0	1		1	0	0	0		2012-03-29	327.413	7	0	40	1.60206	1	0
2012-03-29	1	1	1	33	7	1	N	0	0	0	980.807	0	40	1.60206	0	1	2014-05-21	0	0	2014-09-30	915	0			0	0	0	1		1	0	0	0		2012-03-29	984.984	20	0	78	1.89209	0	0
2012-03-29	1	1	1	35	7		N	0	0	0	482.936	0	20	1.30103	0	1	2014-06-27	0	0	2014-09-30	915	0			0	0	0	1		1	0	0	0		2012-03-29	532.255	11	0	40	1.60206	1	0
2012-04-05	1	1	1	32	7		N	0	0	0	475.42	0	20	1.30103	0	1	2014-04-23	0	0	2014-09-30	908	1	2001-12-06	3773	1	0	0	1		1	0	0	0		2012-04-05	651.638	14	0	56	1.74819	0	0
2012-04-05	1	1	1	69	14		N	0	0	0	432.3	0	35	1.54407	0	1	2014-05-20	0	0	2014-09-30	908	0			0	0	0	1		1	0	0	0		2012-04-05	549.822	11	0	58	1.76343	0	0
2012-04-05	1	1	1	40	8	1	P	1	1	0	421.515	0	291	2.46389	0	0	2014-06-30	0	0	2014-09-30	908	0			0	0	0	1		1	0	0	0		2012-04-05	540.169	11	0	301	2.47857	0	0
2012-04-05	1	1	1	33	7	1	N	0	0	0	360.532	0	301	2.47857	0	0	2014-05-06	0	0	2014-09-30	908	0			0	0	0	1		1	0	0	0		2012-04-05	360.532	8	0	40	1.60206	1	0
2012-04-05	1	1	1	28	6	1	N	0	0	0	591.97	0	20	1.30103	0	1	2014-07-01	0	0	2014-09-30	908	0			0	0	0	1		1	0	0	0		2012-04-05	591.97	12	0	40	1.60206	1	0
2012-04-05	1	1	1	39	8	1	N	0	0	0	707.3	0	20	1.30103	0	1	2012-08-09	1	2	2014-09-30	908	0			0	0	0	1		1	0	0	0		2012-04-05	707.3	15	0	62200	4.79379	0	0
2012-04-05	1	1	1	34	7		N	0	0	0	662.22	0	170000	5.23045	1	0	2014-06-11	0	0	2014-09-30	908	0			0	0	0	1		1	0	0	0		2012-04-05	591.894	12	0	40	1.60206	1	0
2012-04-05	1	1	1	65	13	2	P	1	1	0	1095.21	0	20	1.30103	0	1	2014-06-11	0	0	2014-09-30	908	1	2004-04-15	2912	1	0	0	1		1	0	0	0		2012-04-05	601.398	13	0	40	1.60206	1	0
2012-04-05	1	1	1	49	10	2	N	0	0	0	665.81	0	40	1.60206	0	1	2014-05-18	0	0	2014-09-30	908	0			0	0	0	1		1	0	0	0		2012-04-05	665.81	14	0	40	1.60206	1	0
2012-04-05	1	1	1	53	11		P	1	1	0	198.09	1	20	1.30103	0	1	2014-04-23	0	0	2014-09-30	908	1	2009-01-21	1170	1	0	0	1		1	0	0	0		2012-04-05	198.09	4	1	88	1.94448	0	0
2012-04-05	1	0	1	46	10	2	P	1	1	0	493.24	0	88	1.94448	0	0	2014-05-20	0	0	2014-09-30	908	0			0	0	0	1		1	0	0	0		2012-04-05	493.24	10	0	54	1.73239	0	0
2012-04-05	1	1	1	32	7	1	Indeterminate	2		1	863.654	0	54	1.73239	0	0	2014-06-11	0	0	2014-09-30	908	0			0	0	0	1		1	0	0	0		2012-04-05	863.654	18	0	40	1.60206	1	0
2012-04-05	1	1	1	34	7		N	0	0	0	417.3	0	20	1.30103	0	1	2014-06-27	0	0	2014-09-30	908	0			0	0	0	1		1	0	0	0		2012-04-05	417.3	9	0
2012-04-09	1	1	1	33	7		N	0	0	0	150.59	1	22300	4.3483	0	0	2014-04-16	0	0	2014-09-30	904	0			0	0	0	1	3/6/2012	1	0	0	0		2012-04-09				231000	5.36361	0	1
2012-04-09	1	1	1	30	6		N	0	0	0	639.36	0	441	2.64444	0	0	2014-06-18	0	0	2014-09-30	904	0			0	1	1	0		1	0	0	0		2012-04-09	403.155	9	0	150000	5.17609	0	1
2012-04-09	1	1	1	35	7		N	0	0	0	69.3368	1	72	1.85733	0	0	2014-06-11	0	0	2014-09-30	904	0			0	1	0	0	4/19/2012	1	0	0	1	Cryptosporidiosis	2012-04-09	33.252	1	1	40	1.60206	1	0
2012-04-09	1	1	1	42	9		P	1	1	0	326.821	0	20	1.30103	0	1	2014-06-11	0	0	2014-09-30	904	1	2011-09-13	209	1	0	0	1		1	0	0	0		2012-04-09	259.202	6	0	61100	4.78604	0	0
2012-04-09	1	1	1	40	8		N	0	0	0	473.48	0	124000	5.09342	1	0	2014-06-25	0	0	2014-09-30	904	0			0	0	0	1		1	0	0	0		2012-04-09	301.32	7	0
2012-04-09	1	1	1	29	6	1	N	0	0	0	42.4424	1	14100	4.14922	0	0	2012-07-10	1	2	2014-09-30	904	0			0	0	1	1	4/5/2012	1	0	0	1	cryptococcal meningitis	2012-04-09				40	1.60206	1	0
2012-04-10	1	1	1	36	8	1	N	0	0	0	592.192	0	20	1.30103	0	1	2014-05-04	0	0	2014-09-30	903	0			0	0	0	1		1	0	0	0		2012-04-10	592.192	12	0	40	1.60206	1	0
2012-04-10	1	1	1	50	10	2	P	1	1	0	350.35	0	20	1.30103	0	1	2014-05-04	0	0	2014-09-30	903	1	1998-10-22	4919	1	0	0	1		1	0	0	0		2012-04-10	350.35	7	0	1620	3.20952	0	0
2012-04-10	1	1	1	26	6	1	N	0	0	0	732.96	0	2950	3.46982	0	0	2014-04-24	0	0	2014-09-30	903	0			0	0	0	0		0	0	0	0		2012-04-10	573.418	12	0	40	1.60206	1	0
2012-04-10	1	1	1	42	9	1	N	0	0	0	673.296	0	43	1.63347	0	1	2014-06-20	0	0	2014-09-30	903	0	2007-09-21		0	0	0	1		1	0	0	0		2012-04-10	552.763	12	0	1180	3.07188	0	0
2012-04-10	1	1	1	47	10	1	N	0	0	0	646.447	0	189	2.27646	0	0	2014-06-07	0	0	2014-09-30	903	0			0	0	1	1		1	0	0	1	Acute retinal necrosis due to CMV infection	2012-04-10	546.134	11	0	48	1.68124	1	0
2012-04-10	1	1	1	28	6	1	N	0	0	0	516.952	0	20	1.30103	0	1	2014-05-13	0	0	2014-09-30	903	0			0	0	0	1		1	0	0	0		2012-04-10	577.5	12	0	81800	4.91275	0	0
2012-04-10	1	1	1	41	9		N	0	0	0	336.174	0	43500	4.63849	0	0	2014-07-08	0	0	2014-09-30	903	0			0	0	0	0		1	0	0	0		2012-04-10	415.519	9	0	40	1.60206	1	0
2012-04-11	1	1	1	58	12	1	N	0	0	0	879.255	0	20	1.30103	0	1	2014-07-01	0	0	2014-09-30	902	1	1999-06-24	4675	1	0	0	1		1	0	0	0		2012-04-11	733.166	15	0	5230	3.7185	0	0
2012-04-11	1	1	1	43	9		N	0	0	0	437.544	0	1490	3.17319	0	0	2014-04-23	0	0	2014-09-30	902	0			0	0	0	0		1	0	0	0		2012-04-11	361.643	8	0	40	1.60206	1	0
2012-04-11	1	1	1	40	8	1	N	0	0	0	651.034	0	20	1.30103	0	1	2014-06-12	0	0	2014-09-30	902	0			0	0	0	1		1	0	0	0		2012-04-11	531.686	11	0	48	1.68124	1	0
2012-04-11	1	1	1	40	8	1	N	0	0	0	778.562	0	390	2.59106	0	0	2014-05-18	0	0	2014-09-30	902	0			0	0	0	1		1	0	0	0		2012-04-11	403.657	9	0	10000000	7	0	1
2012-04-11	1	1	1	15	4		N	0	0	0	206.066	0	3390	3.5302	0	0	2012-08-14	1	2	2014-09-30	902	0			0	0	0	0	4/11/2012	1	0	0	0		2012-04-11	43.47	1	1	5300	3.72428	0	0
2012-04-11	1	1	1	40	8	1	N	0	0	0	198.36	1	6560	3.8169	0	0	2014-05-13	0	0	2014-09-30	902	0			0	0	0	0		1	0	0	0		2012-04-11	159.767	4	1	40	1.60206	1	0
2012-04-12	1	1	1	32	7	1	N	0	0	0	870.534	0	51	1.70757	0	0	2014-05-27	0	0	2014-09-30	901	0			0	0	0	1		1	0	0	0		2012-04-12	719.611	15	0	7610	3.88138	0	0
2012-04-12	1	1	1	43	9	1	P	1	1	0	835.285	0	20	1.30103	0	1	2014-05-13	0	0	2014-09-30	901	0			0	0	0	1		1	0	0	0		2012-04-12	699.257	14	0	40	1.60206	1	0
2012-04-12	1	1	1	29	6	1	N	0	0	0	637.394	0	20	1.30103	0	1	2014-05-27	0	0	2014-09-30	901	0			0	0	0	1		1	0	0	0		2012-04-12	518.615	11	0	40	1.60206	1	0
2012-04-12	1	1	1	30	6	1	N	0	0	0	652.299	0	20	1.30103	0	1	2014-05-20	0	0	2014-09-30	901	0			0	0	0	1		1	0	0	0		2012-04-12	656.489	14	0	40	1.60206	1	0
2012-04-12	1	1	1	40	8	1	N	0	0	0	367.8	0	40	1.60206	0	1	2014-05-20	0	0	2014-09-30	901	0			0	0	0	1		1	0	0	0		2012-04-12	367.8	8	0	40	1.60206	1	0
2012-04-12	1	1	1	21	5	1	N	0	0	0	592.249	0	40	1.60206	0	1	2013-07-02	1	2	2014-09-30	901	0			0	0	0	1		1	0	0	0		2012-04-12	611.891	13	0	40	1.60206	1	0
2012-04-12	1	1	1	52	11	2	N	0	0	0	241.511	0	40	1.60206	0	1	2014-06-13	0	0	2014-09-30	901	0			0	0	0	1		1	0	0	0		2012-04-12	241.511	5	0	321	2.50651	0	0
2012-04-12	1	1	1	37	8	1	P	1	1	0	613.305	0	127	2.1038	0	0	2014-06-20	0	0	2014-09-30	901	0			0	0	0	1		1	0	0	0		2012-04-12	628.624	13	0	12700	4.1038	0	0
2012-04-12	1	1	1	27	6		N	0	0	0	333.39	0	273	2.43616	0	0	2014-06-18	0	0	2014-09-30	901	0			0	1	0	0	4/19/2012	1	0	0	0		2012-04-12	223.793	5	0	60	1.77815	0	0
2012-04-12	1	1	1	33	7	1	N	0	0	0	536.141	0	60	1.77815	0	0	2014-04-28	0	0	2014-09-30	901	0			0	0	0	1		1	0	0	0		2012-04-12	536.141	11	0	40	1.60206	1	0
2012-04-12	1	1	1	60	12	2	N	0	0	0	876.19	0	20	1.30103	0	1	2014-05-27	0	0	2014-09-30	901	0			0	0	0	1		1	0	0	0		2012-04-12	519.267	11	0	40	1.60206	1	0
2012-04-12	1	1	1	48	10	2	N	0	0	0	329.977	0	20	1.30103	0	1	2014-05-13	0	0	2014-09-30	901	0			0	0	0	1		1	0	0	0		2012-04-12	455.822	10	0	40	1.60206	1	0
2012-04-12	1	0	1	84	17	2	P	1	1	0	623.35	0	20	1.30103	0	1	2014-07-08	0	0	2014-09-30	901	1	1999-09-18	4590	1	0	0	1		1	0	0	1		2012-04-12	623.35	13	0	40	1.60206	1	0
2012-04-12	1	1	1	39	8	1	P	1	1	0	727.453	0	20	1.30103	0	1	2014-05-04	0	0	2014-09-30	901	0			0	0	0	1		1	0	0	0		2012-04-12	661.565	14	0	40	1.60206	1	0
2012-04-12	1	1	1	39	8	1	P	1	1	0	667.488	0	20	1.30103	0	1	2014-06-20	0	0	2014-09-30	901	0			0	0	0	1		1	0	0	0		2012-04-12	667.488	14	0	40	1.60206	1	0
2012-04-12	1	1	1	34	7		N	0	0	0	431.892	0	40	1.60206	0	1	2014-06-24	0	0	2014-09-30	901	0			0	0	0	1		1	0	0	0		2012-04-12	881.291	18	0	40	1.60206	1	0
2012-04-12	1	1	1	33	7		N	0	0	0	425.04	0	20	1.30103	0	1	2014-05-27	0	0	2014-09-30	901	0			0	0	0	1		1	0	0	0		2012-04-12	418.32	9	0	40	1.60206	1	0
2012-04-12	1	1	1	32	7	1	N	0	0	0	254.1	0	20	1.30103	0	1	2014-05-18	0	0	2014-09-30	901	0			0	0	0	1		1	0	0	0		2012-04-12	284.13	6	0	40	1.60206	1	0
2012-04-12	1	1	1	35	7		N	0	0	0	894.802	0	20	1.30103	0	1	2014-06-01	0	0	2014-09-30	901	0			0	0	0	1		1	0	0	0		2012-04-12	709.9	15	0	40	1.60206	1	0
2012-04-16	1	1	1	29	6		N	0	0	0	664.346	0	20	1.30103	0	1	2014-06-20	0	0	2014-09-30	897	0			0	0	0	1		1	0	0	0		2012-04-16	594.838	12	0	4170	3.62014	0	0
2012-04-16	1	1	1	23	5	1	P	1	1	0	811.034	0	21500	4.33244	0	0	2013-12-24	1	2	2014-09-30	897	0			0	0	0	0		0	0	0	0		2012-04-16	495.9	10	0
2012-04-16	1	1	1	36	8	1	N	0	0	0	4.536	1	NA				2012-04-16	1	2	2014-09-30	897	0			0	0	0	0	6/11/2002	1	0	0	0		2012-04-16	4.536	1	1	65	1.81291	0	0
2012-04-16	1	1	1	40	8		N	0	0	0	37.6	1	65	1.81291	0	0	2014-05-18	0	0	2014-09-30	897	0			0	0	1	1		1	1	0	1	Pneumocystis carinii pneumonia	2012-04-16	47	1	1	298000	5.47422	0	1
2012-04-16	1	1	1	26	6		N	0	0	0	87.8796	1	261	2.41664	0	0	2014-05-25	0	0	2014-09-30	897	0			0	1	1	1	4/11/2012	1	1	0	1	Pneumocystis Jirovecii Pneumonia	2012-04-16	10.229	1	1	46	1.66276	1	0
2012-04-16	1	1	1	42	9	1	N	0	0	0	450.186	0	46	1.66276	0	1	2014-07-08	0	0	2014-09-30	897	0			0	0	0	1		1	0	0	0		2012-04-16	450.186	9	0	108000	5.03342	0	1
2012-04-16	1	1	1	43	9		N	0	0	0	303.379	0	108000	5.03342	1	0	2012-05-31	1	2	2014-09-30	897	0			0	0	0	0	3/28/2012	1	0	0	1	Right neck mass, suspected Burkitt's lymphoma	2012-04-16	303.379	7	0	181	2.25768	0	0
2012-04-17	1	1	1	31	7		N	0	0	0	860.561	0	104	2.01703	0	0	2014-05-19	0	0	2014-09-30	896	0			0	0	0	1		1	0	0	0		2012-04-17	670.5	14	0	115000	5.0607	0	1
2012-04-17	1	1	1	31	7		N	0	0	0	600.002	0	38800	4.58883	0	0	2014-07-08	0	0	2014-09-30	896	0			0	0	0	0	1/2/2013	1	0	0	0		2012-04-17	592.912	12	0	40	1.60206	1	0
2012-04-17	1	1	1	55	11	1	N	0	0	0	468.384	0	20	1.30103	0	1	2014-04-28	0	0	2014-09-30	896	0			0	0	0	1		1	0	0	0		2012-04-17	468.384	10	0	40	1.60206	1	0
2012-04-17	1	1	1	45	9	1	N	0	0	0	442.81	0	20	1.30103	0	1	2014-05-18	0	0	2014-09-30	896	0			0	0	0	1		1	0	0	0		2012-04-17	442.81	9	0	102	2.0086	0	0
2012-04-17	1	1	1	30	6		N	0	0	0	251.039	0	102	2.0086	0	0	2014-07-01	0	0	2014-09-30	896	0			0	0	0	1		1	0	0	1	Old Mycobacterium avium complex bacteremia	2012-04-17	251.039	6	0	40	1.60206	1	0
2012-04-17	1	1	1	54	11	2	P	1	1	0	1176.56	0	20	1.30103	0	1	2014-06-18	0	0	2014-09-30	896	1	1998-02-03	5187	1	0	0	1		1	0	0	0		2012-04-17	1176.56	24	0	6420	3.80754	0	0
2012-04-17	1	1	1	44	9	1	N	0	0	0	576.29	0	6420	3.80754	0	0	2014-05-18	0	0	2014-09-30	896	0			0	0	0	0		0	0	0	0		2012-04-17	576.29	12	0	40	1.60206	1	0
2012-04-17	1	1	1	23	5	1	N	0	0	0	884.904	0	20	1.30103	0	1	2014-04-08	0	0	2014-09-30	896	0			0	0	0	1		1	0	0	0		2012-04-17	884.904	18	0	40	1.60206	1	0
2012-04-17	1	1	1	38	8	1	N	0	0	0	364.899	0	20	1.30103	0	1	2014-04-21	0	0	2014-09-30	896	0			0	0	0	1		1	0	0	0		2012-04-17	361.15	8	0	40	1.60206	1	0
2012-04-17	1	1	1	42	9	1	N	0	0	0	863.99	0	20	1.30103	0	1	2012-04-17	1	2	2014-09-30	896	0			0	0	0	1		1	0	0	1	OPD	2012-04-17	863.99	18	0	84600	4.92737	0	0
2012-04-18	1	1	1	40	8		N	0	0	0	386.958	0	760	2.88081	0	0	2014-07-09	0	0	2014-09-30	895	0			0	1	0	0		1	0	0	0		2012-04-18	266.596	6	0	40	1.60206	1	0
2012-04-18	1	1	1	36	8		N	0	0	0	446.474	0	20	1.30103	0	1	2014-05-20	0	0	2014-09-30	895	0			0	0	0	1		1	0	0	0		2012-04-18	81.2646	2	1	3170000	6.50106	0	1
2012-04-18	1	1	1	47	10		N	0	0	0	3.8799	1	3170000	6.50106	1	0	2014-07-14	0	0	2014-09-30	895	0			0	1	1	0	4/24/2012	1	1	0	1		2012-04-18	3.8799	1	1	14200	4.15229	0	0
2012-04-18	1	1	1	38	8		P	1	1	0	467.303	0	69	1.83885	0	0	2014-05-20	0	0	2014-09-30	895	0			0	0	0	0		1	0	0	0		2012-04-18	426.724	9	0	40	1.60206	1	0
2012-04-19	1	1	1	51	11	1	N	0	0	0	1181.63	0	20	1.30103	0	1	2014-05-27	0	0	2014-09-30	894	0			0	0	0	1		1	0	0	0		2012-04-19	1181.63	24	0	40	1.60206	1	0
2012-04-19	1	1	1	63	13	2	P	1	1	0	234.906	0	20	1.30103	0	1	2014-05-17	0	0	2014-09-30	894	1	2007-04-30	1816	1	0	0	1		1	0	0	0		2012-04-19	234.906	5	0	40	1.60206	1	0
2012-04-19	1	1	1	40	8	1	P	1	1	0	679.788	0	20	1.30103	0	1	2014-05-20	0	0	2014-09-30	894	0			0	0	0	1		1	0	0	0		2012-04-19	679.788	14	0	11100	4.04532	0	0
2012-04-19	1	1	1	38	8		N	0	0	0	755.669	0	10700	4.02938	0	0	2014-05-27	0	0	2014-09-30	894	0			0	0	0	0		0	0	0	0		2012-04-19	796.077	16	0	23700	4.37475	0	0
2012-04-19	1	1	1	27	6	1	N	0	0	0	527.472	0	22300	4.3483	0	0	2014-06-25	0	0	2014-09-30	894	0			0	0	0	0		1	0	0	0		2012-04-19	568.022	12	0	164000	5.21484	0	1
2012-04-19	1	1	1	19	4	1	N	0	0	0	380.159	0	143000	5.15534	1	0	2014-07-10	0	0	2014-09-30	894	0			0	0	0	0		1	0	0	0		2012-04-19	2890.46	58	0	40	1.60206	1	0
2012-04-19	1	1	1	47	10	1	N	0	0	0	854.129	0	40	1.60206	0	1	2014-05-20	0	0	2014-09-30	894	0			0	0	0	1		1	0	0	0		2012-04-19	863.77	18	0	40	1.60206	1	0
2012-04-19	1	1	1	47	10	1	N	0	0	0	456.209	0	20	1.30103	0	1	2014-04-23	0	0	2014-09-30	894	0			0	0	0	1		1	0	0	0		2012-04-19	456.209	10	0	17100	4.233	0	0
2012-04-19	1	1	1	27	6	1	N	0	0	0	421.821	0	17100	4.233	0	0	2013-03-28	1	2	2014-09-30	894	0			0	0	0	0		0	0	0	0		2012-04-19	421.821	9	0	40	1.60206	1	0
2012-04-19	1	1	1	74	15	2	N	0	0	0	736	0	40	1.60206	0	1	2014-02-16	0	1	2014-09-30	668	0			0	0	0	1		1	0	0	1		2012-04-19	739.685	15	0	269000	5.42975	0	1
2012-04-19	1	1	1	28	6		N	0	0	0	320.128	0	370	2.5682	0	0	2014-04-16	0	0	2014-09-30	894	0			0	1	0	1		1	0	0	0		2012-04-19	152.768	4	1	40	1.60206	1	0
2012-04-19	1	1	1	35	7	1	N	0	0	0	544.201	0	20	1.30103	0	1	2014-04-23	0	0	2014-09-30	894	0			0	0	0	1		1	0	0	0		2012-04-19	544.201	11	0	18500	4.26717	0	0
2012-04-19	1	1	1	31	7	1	N	0	0	0	498.465	0	18500	4.26717	0	0	2014-04-02	0	0	2014-09-30	894	0			0	0	0	0		0	0	0	0		2012-04-19	498.465	10	0	40	1.60206	1	0
2012-04-19	1	1	1	53	11	2	N	0	0	0	780.14	0	20	1.30103	0	1	2014-05-13	0	0	2014-09-30	894	0			0	0	0	1		1	0	0	0		2012-04-19	780.14	16	0	40	1.60206	1	0
2012-04-19	1	1	1	31	7		N	0	0	0	301.92	0	40	1.60206	0	1	2014-06-13	0	0	2014-09-30	894	0			0	0	0	1		1	0	0	0		2012-04-19	267.894	6	0	40	1.60206	1	0
2012-04-19	1	1	1	44	9	2	N	0	0	0	856.44	0	20	1.30103	0	1	2014-05-27	0	0	2014-09-30	894	0			0	0	0	1		1	0	0	0		2012-04-19	805.896	17	0	336000	5.52634	0	1
2012-04-19	1	1	1	46	10		N	0	0	0	7	1	336000	5.52634	1	0	2012-07-10	0	1	2014-09-30	82	0			0	0	0	0		0	0	0	0		2012-04-19	7.4002	1	1	40	1.60206	1	0
2012-04-19	1	1	1	34	7		N	0	0	0	760.496	0	40	1.60206	0	1	2013-08-08	1	2	2014-09-30	894	0			0	0	0	1		1	0	0	0		2012-04-19	752.22	16	0	13200	4.12057	0	0
2012-04-23	1	1	1	21	5	1	P	1	1	0	579.942	0	13200	4.12057	0	0	2014-07-11	0	0	2014-09-30	890	0			0	0	0	0		0	0	0	0		2012-04-23	579.942	12	0	40	1.60206	1	0
2012-04-23	1	1	1	33	7	1	N	0	0	0	1340.42	0	40	1.60206	0	1	2014-06-01	0	0	2014-09-30	890	0			0	0	0	1		1	0	0	0		2012-04-23	895.23	18	0	102	2.0086	0	0
2012-04-24	1	1	1	62	13	2	N	0	0	0	257.942	0	102	2.0086	0	0	2014-05-18	0	0	2014-09-30	889	0			0	0	0	1		1	0	0	0		2012-04-24	257.942	6	0	593000	5.77305	0	1
2012-04-24	1	1	1	24	5	1	N	0	0	0	133.076	1	61200	4.78675	0	0	2014-06-20	0	0	2014-09-30	889	0			0	0	0	0		1	0	0	0		2012-04-24	70.4374	2	1	42800	4.63144	0	0
2012-04-24	1	1	1	41	9		N	0	0	0	427.23	0	33600	4.52634	0	0	2014-04-28	0	0	2014-09-30	889	0			0	0	0	0		1	0	0	0		2012-04-24	470.12	10	0	40	1.60206	1	0
2012-04-24	1	1	1	36	8	1	N	0	0	0	882.821	0	20	1.30103	0	1	2014-07-01	0	0	2014-09-30	889	0			0	0	0	1		1	0	0	0		2012-04-24	503.474	11	0	3320	3.52114	0	0
2012-04-24	1	1	1	21	5	1	N	0	0	0	374.549	0	251	2.39967	0	0	2013-12-10	1	2	2014-09-30	889	0			0	0	0	1		1	0	0	0		2012-04-24	366.858	8	0	85	1.92942	0	0
2012-04-24	1	1	1	44	9		N	0	0	0	682.114	0	71	1.85126	0	0	2014-05-06	0	0	2014-09-30	889	0			0	0	0	1		1	0	0	0		2012-04-24	802.419	17	0	40	1.60206	1	0
2012-04-24	1	0	1	53	11	2	P	1	1	0	891.79	0	20	1.30103	0	1	2014-06-18	0	0	2014-09-30	889	0			0	0	0	1		1	0	0	0		2012-04-24	891.79	18	0	490000	5.6902	0	1
2012-04-24	1	1	1	52	11		N	0	0	0	35.045	1	490000	5.6902	1	0	2014-06-18	0	0	2014-09-30	889	0			0	0	0	1		1	0	0	0		2012-04-24	35.045	1	1	40	1.60206	1	0
2012-04-24	1	1	1	66	14	2	P	1	1	0	468.686	0	20	1.30103	0	1	2014-05-18	0	0	2014-09-30	889	1	2002-11-27	3436	1	0	0	1		1	0	0	0		2012-04-24	470.101	10	0	40	1.60206	1	0
2012-04-24	1	1	1	41	9		N	0	0	0	737.062	0	20	1.30103	0	1	2014-05-04	0	0	2014-09-30	889	0			0	0	0	1		1	0	0	0		2012-04-24	737.062	15	0	40	1.60206	1	0
2012-04-24	1	1	1	39	8	1	N	0	0	0	387.379	0	46	1.66276	0	1	2014-07-10	0	0	2014-09-30	889	0			0	0	0	1		1	0	0	0		2012-04-24	459.612	10	0	3440	3.53656	0	0
2012-04-24	1	1	1	34	7	2	N	0	0	0	604.282	0	15300	4.18469	0	0	2013-10-24	1	2	2014-09-30	889	0			0	0	0	0		0	0	0	0		2012-04-24	665.496	14	0	40	1.60206	1	0
2012-04-25	1	1	1	38	8		N	0	0	0	523.404	0	20	1.30103	0	1	2014-06-25	0	0	2014-09-30	888	0			0	0	0	1		1	0	0	0		2012-04-25	317.367	7	0	178000	5.25042	0	1
2012-04-25	1	1	1	34	7		N	0	0	0	158.166	1	906	2.95713	0	0	2013-02-16	1	2	2014-09-30	888	0			0	1	0	0	5/1/2012	1	0	0	0		2012-04-25	86.4459	2	1	40	1.60206	1	0
2012-04-26	1	1	1	53	11		N	0	0	0	293.994	0	20	1.30103	0	1	2014-05-20	0	0	2014-09-30	887	0			0	0	0	1		1	0	0	0		2012-04-26	293.994	6	0	117000	5.06819	0	1
2012-04-26	1	1	1	30	6		N	0	0	0	365.039	0	612	2.78675	0	0	2014-06-13	0	0	2014-09-30	887	0			0	0	0	0	4/26/2012	1	0	0	0		2012-04-26	356.151	8	0	74	1.86923	0	0
2012-04-26	1	1	1	29	6		N	0	0	0	380.926	0	20	1.30103	0	1	2014-07-07	0	0	2014-09-30	887	0			0	0	0	1		1	0	0	0		2012-04-26	340.548	7	0	1490	3.17319	0	0
2012-04-26	1	0	1	69	14	2	P	1	1	0	692.249	0	40	1.60206	0	1	2014-06-11	0	0	2014-09-30	887	0			0	0	0	1		1	0	0	0		2012-04-26	681.01	14	0	273	2.43616	0	0
2012-04-26	1	1	1	50	10		N	0	0	0	421.491	0	40	1.60206	0	1	2014-07-01	0	0	2014-09-30	887	0			0	0	0	1		1	0	0	0		2012-04-26	383.198	8	0	40	1.60206	1	0
2012-04-26	1	1	1	42	9	1	N	0	0	0	432.112	0	20	1.30103	0	1	2014-07-07	0	0	2014-09-30	887	0			0	0	0	1		1	0	0	0		2012-04-26	374.08	8	0	155	2.19033	0	0
2012-04-26	1	1	1	36	8		N	0	0	0	553.504	0	110	2.04139	0	0	2014-06-25	0	0	2014-09-30	887	0			0	0	0	1		1	0	0	0		2012-04-26	460.447	10	0	17400	4.24055	0	0
2012-04-26	1	1	1	42	9		N	0	0	0	620.948	0	19600	4.29226	0	0	2014-04-09	0	0	2014-09-30	887	0			0	0	0	1		1	0	0	0		2012-04-26	556.278	12	0	258	2.41162	0	0
2012-04-26	1	1	1	42	9		N	0	0	0	712.714	0	20	1.30103	0	1	2014-06-12	0	0	2014-09-30	887	0			0	0	0	1		1	0	0	0		2012-04-26	628.442	13	0	40	1.60206	1	0
2012-04-26	1	1	1	26	6	1	N	0	0	0	578.647	0	20	1.30103	0	1	2014-05-19	0	0	2014-09-30	887	0			0	0	0	1		1	0	0	0		2012-04-26	582.58	12	0	99	1.99564	0	0
2012-04-26	1	1	1	50	10	1	N	0	0	0	363.359	0	20	1.30103	0	1	2014-05-20	0	0	2014-09-30	887	0			0	0	0	1		1	0	0	0		2012-04-26	325.222	7	0	25600	4.40824	0	0
2012-04-26	1	0	1	34	7		N	0	0	0	104.91	1	294	2.46835	0	0	2014-05-26	0	0	2014-09-30	887	0			0	1	0	1	3/29/2012	1	0	0	0		2012-04-26	37.6352	1	1	40	1.60206	1	0
2012-04-26	1	1	1	42	9		N	0	0	0	681.346	0	20	1.30103	0	1	2014-07-08	0	0	2014-09-30	887	0			0	0	0	1		1	0	0	0		2012-04-26	577.681	12	0	40	1.60206	1	0
2012-04-26	1	1	1	36	8	1	N	0	0	0	627.558	0	20	1.30103	0	1	2014-04-28	0	0	2014-09-30	887	0			0	0	0	1		1	0	0	0		2012-04-26	755.73	16	0	40	1.60206	1	0
2012-04-26	1	1	1	39	8	1	N	0	0	0	1131.52	0	20	1.30103	0	1	2014-05-20	0	0	2014-09-30	887	0			0	0	0	1		1	0	0	0		2012-04-26	1131.52	23	0	45	1.65321	1	0
2012-04-26	1	1	1	62	13	2	N	0	0	0	1010.47	0	45	1.65321	0	1	2014-06-20	0	0	2014-09-30	887	1	2003-08-11	3181	1	0	0	1		1	0	0	0		2012-04-26	1010.47	21	0	36200	4.55871	0	0
2012-04-26	1	1	1	31	7		N	0	0	0	262.219	0	25100	4.39967	0	0	2014-04-04	0	0	2014-09-30	887	0			0	0	0	0		0	0	0	0		2012-04-26	321.081	7	0	40	1.60206	1	0
2012-04-26	1	1	1	39	8	1	N	0	0	0	426.488	0	20	1.30103	0	1	2014-06-25	0	0	2014-09-30	887	0			0	0	0	1		1	0	0	0		2012-04-26	290.014	6	0	40	1.60206	1	0
2012-04-26	1	1	1	39	8		N	0	0	0	316.064	0	20	1.30103	0	1	2014-05-13	0	0	2014-09-30	887	0			0	0	0	1		1	0	0	0		2012-04-26	316.064	7	0	40	1.60206	1	0
2012-04-26	1	1	1	48	10	1	N	0	0	0	285.452	0	20	1.30103	0	1	2014-06-20	0	0	2014-09-30	887	0			0	0	0	1		1	0	0	0		2012-04-26	222.264	5	0	103000	5.01284	0	1
2012-05-02	1	1	1	27	6		N	0	0	0	225.703	0	36900	4.56703	0	0	2014-05-06	0	0	2014-09-30	881	0			0	0	0	0		0	0	0	0		2012-05-02	448.859	9	0	164000	5.21484	0	1
2012-05-02	1	1	1	28	6	1	N	0	0	0	333.884	0	453	2.6561	0	0	2014-05-11	0	0	2014-09-30	881	0			0	1	1	0	5/4/2012	1	1	0	1		2012-05-02	87.884	2	1	63100	4.80003	0	0
2012-05-02	1	1	1	28	6	1	N	0	0	0	2	1	519	2.71517	0	0	2012-09-19	1	2	2014-09-30	881	0			0	0	1	0	5/1/2012	1	0	0	0		2012-05-02	0	1	1	58300	4.76567	0	0
2012-05-02	1	1	1	26	6		N	0	0	0	613.796	0	14200	4.15229	0	0	2014-05-15	0	0	2014-09-30	881	0			0	1	0	0		1	0	0	0		2012-05-02	430.776	9	0	9270	3.96708	0	0
2012-05-02	1	1	1	23	5	1	N	0	0	0	470.527	0	4660	3.66839	0	0	2014-06-18	0	0	2014-09-30	881	0			0	0	0	0		1	0	0	0		2012-05-02	461.333	10	0	117	2.06819	0	0
2012-05-09	1	1	1	30	6		N	0	0	0	581.808	0	589	2.77012	0	0	2014-06-15	0	0	2014-09-30	874	0			0	0	0	1		1	0	0	0		2012-05-09	496.886	10	0	92600	4.96661	0	0
2012-05-09	1	1	1	25	5		N	0	0	0	522.753	0	92600	4.96661	0	0	2014-05-20	0	0	2014-09-30	874	0			0	0	0	0		1	0	0	0		2012-05-09	522.753	11	0	40	1.60206	1	0
2012-05-10	1	1	1	44	9	2	P	1	1	0	562.4	0	20	1.30103	0	1	2014-06-13	0	0	2014-09-30	873	1	2000-08-31	4270	1	0	0	1		1	0	0	0		2012-05-10	562.4	12	0	40	1.60206	1	0
2011-12-28	1	1	1	25	5	4	N	0	0	0	58.4237	1	20	1.30103	0	1	2014-07-16	0	0	2014-09-30	1007	0			0	0	0	1		1	0	0			2011-12-28	452	10	0	100	2	0	0
2011-09-19	1	1	1	33	7		N	0	0	0	466.07	0	396	2.5977	0	0	2012-08-27	1	2	2014-09-30	1107	0			0	0	0	0	2011-09-29	1	0	0			2011-09-19	450.718	10	0	33800	4.52892	0	0
2011-09-22	1	1	1	23	5	1	N	0	0	0	358.798	0	38700	4.58771	0	0	2014-01-29	0	0	2014-09-30	1104	0			0	0	0	0		1	0	0			2011-09-22	397.197	8	0	61800	4.79099	0	0
2011-04-11	1	1	1	35	7		N	0	0	0	82.53	1	61800	4.79099	0	0	2011-04-20	1	2	2014-09-30	1268	0			0	1	1	0	4/15/2011	1	1	0			2011-04-11	82.53	2	1	9620	3.98318	0	0
2011-10-18	1	1	1	24	5	4	N	0	0	0	380.582	0	11600	4.06446	0	0	2012-03-13	1	2	2014-09-30	1078	0			0	0	0	0		0	0	0			2011-10-18	406	9	0	8920	3.95036	0	0
2011-04-21	1	1	1	41	9		N	0	0	0	87.1416	1	1230	3.08991	0	0	2014-05-15	0	0	2014-09-30	1258	0			0	1	1	0		1	1	0	1	CMV pneumonitis; amebiasis colitis	2011-04-21	24	1	1	20	1.30103	1	0
2011-10-12	1	1	1	32	7		N	0	0	0	NA		NA				2012-07-19	1	2	2014-09-30	1084	0			0	0	0	1	4/13/2011	1	0	0	0		2011-10-12				359	2.55509	0	0
2011-12-12	1	1	1	47	10		N	0	0	0	200.935	0	6610	3.8202	0	0	2014-07-01	0	0	2014-09-30	1023	0			0	0	0	1		1	0	0			2011-12-12	310.488	7	0	38400	4.58433	0	0
2011-04-28	1	1	1	46	10		N	0	0	0	NA		38400	4.58433	0	0	2014-07-10	0	0	2014-09-30	1251	0			0	0	1	0	5/1/2011	1		0			2011-04-28				120000	5.07918	0	1
2011-05-23	1	1	1	31	7		N	0	0	0	9	1	120000	5.07918	1	0	2014-05-29	0	0	2014-09-30	1226	0			0	1	1	0	6/1/2011	1	1	0	1	PCP, CMV pneumonitis	2011-05-23	9.084	1	1	364	2.5611	0	0
2011-09-01	1	1	1	24	5	1	N	0	0	0	526.848	0	316	2.49969	0	0	2014-05-15	0	0	2014-09-30	1125	0			0	0	0	0	7/25/2013	1	0	0	0		2011-09-01	357.339	8	0	407	2.60959	0	0
2011-12-27	1	1	1	27	6		N	0	0	0	922.632	0	407	2.60959	0	0	2014-05-22	0	0	2014-09-30	1008	0			0	0	0	0	11/29/2011	1	0	0	0	Primary HIV infection	2011-12-27	662.256	14	0	976	2.98945	0	0
2011-08-04	1	1	1	24	5	1	N	0	0	0	201.838	0	1340000	6.1271	1	0	2014-07-16	0	0	2014-09-30	1153	0			0	0	0	0	9/6/2011	1	0	0	0		2011-08-04	432.276	9	0	8970	3.95279	0	0
2011-07-28	1	1	1	27	6	1	N	0	0	0	33.5916	1	191	2.28103	0	0	2013-01-17	1	2	2014-09-30	1160	0			0	0	1	1		1	1	0	1	CMV, MAC	2011-07-28	28.1196	1	1	68200	4.83378	0	0
2011-08-16	1	0	1	46	10		N	0	0	0	11	1	979000	5.99078	1	0	2014-06-17	0	0	2014-09-30	1141	0			0	1	1	1	7/11/2011	1	0	0	1	Toxoplasmosis	2011-08-16	26.075	1	1	9890	3.9952	0	0
2011-07-28	1	1	1	41	9		Indeterminate	2		1	36	1	721000	5.85794	1	0	2014-05-22	0	0	2014-09-30	1160	0			0	1	1	0	8/1/2011	1	1	0	0		2011-07-28	256.671	6	0	40	1.60206	1	0
2011-11-02	1	1	1	20	4	1	N	0	0	0	458.962	0	583	2.76567	0	0	2014-06-26	0	0	2014-09-30	1063	0			0	0	0	0	11/10/2011	1	0	0	0		2011-11-02	517.14	11	0	122	2.08636	0	0
2011-08-11	1	1	1	54	11		N	0	0	0	23.529	1	172000	5.23553	1	0	2013-11-14	1	2	2014-09-30	1146	0			0	1	1	0	8/15/2011	1	1	0	0		2011-08-11	108.984	3	1	49400	4.69373	0	0
2011-08-25	1	1	1	25	5	1	N	0	0	0	257.554	0	49400	4.69373	0	0	2014-07-05	0	0	2014-09-30	1132	0			0	1	0	0		1	0	0	0		2011-08-25	257.554	6	0	835	2.92169	0	0
2011-11-17	1	1	1	32	7		N	0	0	0	391.158	0	835	2.92169	0	0	2014-01-15	0	0	2014-09-30	1048	0			0	0	0	1		1	0	0	0		2011-11-17	391.158	8	0	215	2.33244	0	0
2011-09-08	1	0	1	37	8	1	N	0	0	0	33.3154	1	1470000	6.16732	1	0	2014-06-12	0	0	2014-09-30	1118	0			0	0	1	1	8/25/2011	1	0	0	1	Community-acquired pneumonia	2011-09-08	220.235	5	0	798	2.902	0	0
2011-08-24	1	1	1	30	6		N	0	0	0	260.06	0	194000	5.2878	1	0	2014-06-26	0	0	2014-09-30	1133	0			0	1	0	0	9/22/2011	1	0	0	0		2011-08-24	62.3665	2	1	6830	3.83442	0	0
2011-08-24	1	1	1	30	6		N	0	0	0	493.021	0	6830	3.83442	0	0	2014-05-29	0	0	2014-09-30	1133	0			0	0	0	0		1	0	0	0		2011-08-24	493.021	10	0
2011-08-31	1	1	1	30	6		N	0	0	0	54.684	1	156000	5.19312	1	0	2011-09-01	1	2	2014-09-30	1126	0			0	1	1	0	8/30/2011	1	0	0	1	Aseptic meningitis, suspected herpes virus related; Esophageal candidiasis; Ankylosing spondylitis	2011-08-31				229	2.35984	0	0
2011-08-25	1	1	1	27	6	1	N	0	0	0	210.506	0	229	2.35984	0	0	2011-12-29	1	2	2014-09-30	1132	0			0	0	0	0	9/2/2011	1	0	0	0		2011-08-25	210.506	5	0	129000	5.11059	0	1
2011-09-08	1	1	1	37	8		N	0	0	0	4.0752	1	129000	5.11059	1	0	2014-05-08	0	0	2014-09-30	1118	0			0	1	1	0	9/19/2011	1	1	0	1	PCP	2011-09-08	4.0752	1	1	40	1.60206	1	0
2012-05-10	1	1	1	53	11		N	0	0	0	348.21	0	20	1.30103	0	1	2014-04-23	0	0	2014-09-30	873	0			0	0	0	1		1	0	0	0		2012-05-10	432.525	9	0	40	1.60206	1	0
2012-05-10	1	1	1	35	7	1	P	1	1	0	493.503	0	20	1.30103	0	1	2014-05-13	0	0	2014-09-30	873	1	2007-07-04	1772	1	0	0	1		1	0	0	0		2012-05-10	551.284	12	0	6790	3.83187	0	0
2012-05-10	1	1	1	28	6		N	0	0	0	363.285	0	1620	3.20952	0	0	2014-06-18	0	0	2014-09-30	873	0			0	0	0	0		1	0	0	0		2012-05-10	498.97	10	0	23200	4.36549	0	0
2012-05-10	1	1	1	29	6	1	N	0	0	0	634.065	0	20	1.30103	0	1	2014-06-20	0	0	2014-09-30	873	0			0	0	0	1		1	0	0	0		2012-05-10	496.132	10	0	40	1.60206	1	0
2012-05-10	1	1	1	44	9	1	N	0	0	0	441.441	0	20	1.30103	0	1	2014-07-10	0	0	2014-09-30	873	0			0	0	0	1		1	0	0	0		2012-05-10	441.441	9	0	40	1.60206	1	0
2012-05-10	1	1	1	29	6		N	0	0	0	498.56	0	20	1.30103	0	1	2014-06-13	0	0	2014-09-30	873	0			0	0	0	1		1	0	0	0		2012-05-10	470.362	10	0	40	1.60206	1	0
2012-05-10	1	1	1	39	8		N	0	0	0	650.454	0	20	1.30103	0	1	2014-06-11	0	0	2014-09-30	873	0			0	0	0	1		1	0	0	0		2012-05-10	633.204	13	0	40	1.60206	1	0
2012-05-10	1	1	1	27	6	1	N	0	0	0	1054.7	0	20	1.30103	0	1	2014-06-13	0	0	2014-09-30	873	0			0	0	0	1		1	0	0	0		2012-05-10	865.03	18	0	40	1.60206	1	0
2012-05-10	1	1	1	32	7	1	N	0	0	0	601.53	0	20	1.30103	0	1	2014-06-13	0	0	2014-09-30	873	0			0	0	0	1		1	0	0	0		2012-05-10	601.53	13	0	1750	3.24304	0	0
2012-05-10	1	1	1	30	6	1	N	0	0	0	153.403	1	533000	5.72673	1	0	2014-04-02	0	0	2014-09-30	873	0			0	0	0	0	4/12/2012	1	0	0	0		2012-05-10	239.184	5	0	40	1.60206	1	0
2012-05-10	1	1	1	57	12	1	P	1	1	0	446.09	0	20	1.30103	0	1	2014-05-27	0	0	2014-09-30	873	0			0	0	0	1		1	0	0	0		2012-05-10	437.483	9	0	40	1.60206	1	0
2012-05-10	1	1	1	28	6	1	N	0	0	0	665.877	0	20	1.30103	0	1	2014-06-20	0	0	2014-09-30	873	0			0	0	0	1		1	0	0	0		2012-05-10	492.007	10	0	485	2.68574	0	0
2012-05-10	1	1	1	30	6		N	0	0	0	276.968	0	95500	4.98	0	0	2014-05-26	0	0	2014-09-30	873	0			0	0	0	1		1	0	0	0		2012-05-10	521.098	11	0	130000	5.11394	0	1
2012-05-14	1	1	1	27	6		N	0	0	0	40	1	130000	5.11394	1	0	2012-05-20	0	1	2014-09-30	6	0			0	0	1	1		1	1	0	1		2012-05-14	39.7854	1	1	171	2.233	0	0
2012-05-15	1	1	1	40	8		N	0	0	0	145.233	1	20	1.30103	0	1	2014-04-21	0	0	2014-09-30	868	0			0	0	0	1		1	0	0	0		2012-05-15	314.828	7	0	66	1.81954	0	0
2012-05-15	1	1	1	25	5	1	N	0	0	0	498.043	0	66	1.81954	0	0	2014-07-08	0	0	2014-09-30	868	0			0	0	0	1		1	0	0	0		2012-05-15	498.043	10	0	40	1.60206	1	0
2012-05-15	1	1	1	58	12	2	N	0	0	0	816.96	0	20	1.30103	0	1	2014-07-01	0	0	2014-09-30	868	0			0	0	0	1		1	0	0	0		2012-05-15	1499.58	30	0	40	1.60206	1	0
2012-05-15	1	1	1	28	6	1	N	0	0	0	875	0	40	1.60206	0	1	2012-09-01	1	2	2014-09-30	868	0			0	0	0	0	4/24/2012	1	0	0	0		2012-05-15	874.64	18	0	40	1.60206	1	0
2012-05-15	1	1	1	35	7		N	0	0	0	688.446	0	20	1.30103	0	1	2014-06-12	0	0	2014-09-30	868	0			0	0	0	1		1	0	0	0		2012-05-15	688.446	14	0	40	1.60206	1	0
2012-05-15	1	1	1	49	10	1	Indeterminate	2		1	529.229	0	20	1.30103	0	1	2014-06-11	0	0	2014-09-30	868	0			0	0	0	1		1	0	0	0		2012-05-15	545.1	11	0	40	1.60206	1	0
2012-05-15	1	1	1	53	11	1	P	1	1	0	729.459	0	20	1.30103	0	1	2014-06-11	0	0	2014-09-30	868	1	2002-04-03	3695	1	0	0	1		1	0	0	0		2012-05-15	729.459	15	0	1420	3.15229	0	0
2012-05-15	1	1	1	41	9	1	N	0	0	0	267.594	0	142000	5.15229	1	0	2014-06-18	0	0	2014-09-30	868	0			0	0	0	0	4/17/2012	1	0	0	0		2012-05-15	288.35	6	0	40	1.60206	1	0
2012-05-15	1	1	1	28	6		N	0	0	0	543.208	0	40	1.60206	0	1	2014-06-29	0	0	2014-09-30	868	0			0	0	0	1		1	0	0	0		2012-05-15	26.8203	1	1	40	1.60206	1	0
2012-05-15	1	1	1	43	9	1	N	0	0	0	124.815	1	20	1.30103	0	1	2014-04-28	0	0	2014-09-30	868	0			0	0	0	1		1	0	0	0		2012-05-15	124.815	3	1	1330	3.12385	0	0
2012-05-16	1	1	1	24	5		N	0	0	0	17.16	1	820000	5.91381	1	0	2013-08-17	1	2	2014-09-30	867	0			0	1	1	0	4/11/2012	1	0	0	0		2012-05-16	130.32	3	1	763000	5.88252	0	1
2012-05-16	1	1	1	33	7		N	0	0	0	216.916	0	225	2.35218	0	0	2014-07-15	0	0	2014-09-30	867	0			0	1	0	0		1	0	0	0		2012-05-16	62.964	2	1	40	1.60206	1	0
2012-05-17	1	1	1	32	7	1	N	0	0	0	395.475	0	20	1.30103	0	1	2014-05-20	0	0	2014-09-30	866	0			0	0	0	1		1	0	0	0		2012-05-17	700.928	15	0	40	1.60206	1	0
2012-05-17	1	1	1	63	13	1	P	1	1	0	1277.56	0	20	1.30103	0	1	2014-06-27	0	0	2014-09-30	866	1	1998-09-28	4980	1	0	0	1		1	0	0	0		2012-05-17	1044.13	21	0	40	1.60206	1	0
2012-05-17	1	1	1	49	10		N	0	0	0	679.101	0	22	1.34242	0	1	2014-06-13	0	0	2014-09-30	866	0			0	0	0	1		1	0	0	0		2012-05-17	831.132	17	0	40	1.60206	1	0
2012-05-17	1	1	1	31	7		N	0	0	0	755	0	40	1.60206	0	1	2014-06-28	0	0	2014-09-30	866	0			0	0	0	1		1	0	0	0		2012-05-17	755.137	16	0	40	1.60206	1	0
2012-05-17	1	1	1	62	13	1	N	0	0	0	490.985	0	40	1.60206	0	1	2014-05-13	0	0	2014-09-30	866	0			0	0	0	1		1	0	0	0		2012-05-17	594.106	12	0	40	1.60206	1	0
2012-05-17	1	1	1	37	8	1	N	0	0	0	394.493	0	40	1.60206	0	1	2014-06-25	0	0	2014-09-30	866	0			0	0	0	1		1	0	0	0		2012-05-17	394.493	8	0	40	1.60206	1	0
2012-05-17	1	1	1	48	10	1	N	0	0	0	650.139	0	20	1.30103	0	1	2014-07-13	0	0	2014-09-30	866	1	1999-10-26	4587	1	0	0	1		1	0	0	0		2012-05-17	606.114	13	0	40	1.60206	1	0
2012-05-17	1	1	1	44	9	2	P	1	1	0	589.243	0	20	1.30103	0	1	2014-06-13	0	0	2014-09-30	866	0			0	0	0	1		1	0	0	0		2012-05-17	589.243	12	0	40	1.60206	1	0
2012-05-17	1	1	1	37	8	1	N	0	0	0	527.927	0	20	1.30103	0	1	2014-07-08	0	0	2014-09-30	866	0			0	0	0	1		1	0	0	0		2012-05-17	527.927	11	0	40	1.60206	1	0
2012-05-17	1	1	1	54	11	1	N	0	0	0	222.072	0	20	1.30103	0	1	2014-06-20	0	0	2014-09-30	866	1	2008-01-17	1582	1	0	0	1		1	0	0	0		2012-05-17	318.947	7	0	40	1.60206	1	0
2012-05-17	1	1	1	25	5	1	N	0	0	0	488.717	0	20	1.30103	0	1	2014-06-20	0	0	2014-09-30	866	0			0	0	0	1		1	0	0	0		2012-05-17	414.166	9	0	40	1.60206	1	0
2012-05-17	1	1	1	43	9	1	P	1	1	0	535	0	35	1.54407	0	1	2014-05-11	0	0	2014-09-30	866	1	1998-09-09	4999	1	0	0	1		1	0	0	0		2012-05-17	387.66	8	0	70100	4.84572	0	0
2012-05-17	1	1	1	40	8		N	0	0	0	220.932	0	171	2.233	0	0	2014-04-23	0	0	2014-09-30	866	0			0	1	0	0	5/17/2012	1	1	0	1		2012-05-17	67.952	2	1	40	1.60206	1	0
2012-05-17	1	0	1	75	15	2	N	0	0	0	281.554	0	20	1.30103	0	1	2014-06-25	0	0	2014-09-30	866	0			0	0	0	1		1	0	0	0		2012-05-17	281.554	6	0	40	1.60206	1	0
2012-05-17	1	1	1	38	8		N	0	0	0	445.84	0	20	1.30103	0	1	2014-06-12	0	0	2014-09-30	866	0			0	0	0	1		1	0	0	0		2012-05-17	437.317	9	0	377000	5.57634	0	1
2012-05-17	1	1	1	32	7		N	0	0	0	484.218	0	1860	3.26951	0	0	2014-06-18	0	0	2014-09-30	866	0			0	0	0	0		1	0	0	0		2012-05-17	227.457	5	0	14000	4.14613	0	0
2012-05-17	1	1	1	24	5	1	N	0	0	0	535.68	0	82	1.91381	0	0	2012-07-05	1	2	2014-09-30	866	0			0	0	0	0		1	0	0	0		2012-05-17	317.58	7	0	40	1.60206	1	0
2012-05-17	1	1	1	48	10	1	N	0	0	0	676.494	0	20	1.30103	0	1	2014-07-08	0	0	2014-09-30	866	0			0	0	0	1		1	0	0	0		2012-05-17	667.67	14	0	40	1.60206	1	0
2012-05-17	1	1	1	47	10		N	0	0	0	767.923	0	102	2.0086	0	0	2012-06-14	1	2	2014-09-30	866	0			0	0	0	1		1	0	0	0		2012-05-17	621.621	13	0	5030	3.70157	0	0
2012-05-21	1	1	1	50	10		N	0	0	0	415.664	0	190	2.27875	0	0	2014-07-09	0	0	2014-09-30	862	0			0	0	1	1	2012-04-17	1	0	0	0		2012-05-21	128.833	3	1	189	2.27646	0	0
2012-05-21	0	1	1	45	9		P	1	1	0	175.35	1	189	2.27646	0	0	2014-05-18	0	0	2014-09-30	862	1	2012-05-21	0	0	0	0	1	NA	1	0	1	0		2012-05-21	175.35	4	1	60700	4.78319	0	0
2012-05-21	1	1	1	27	6	1	N	0	0	0	1964.74	0	40	1.60206	0	1	2014-07-08	0	0	2014-09-30	862	0			0	0	1	0	2014-05-21	1	0	0	0		2012-05-21	844	17	0	60700	4.78319	0	0
2012-05-22	1	1	1	35	7		N	0	0	0	484.735	0	40	1.60206	0	1	2013-08-06	1	2	2014-09-30	861	0			0	0	0	1		1	0	0	0		2012-05-22	414.92	9	0
2012-05-22	0	0	1	25	5		P	1	1	0	682	0	94900	4.97727	0	0	2014-07-15	0	0	2014-09-30	861	1	2012-06-05	-14	0	0	0	0		0	0	1	0		2012-05-22				40	1.60206	1	0
2012-05-22	1	1	1	39	8	1	N	0	0	0	684.814	0	20	1.30103	0	1	2014-05-11	0	0	2014-09-30	861	0			0	0	0	1		1	0	0	0		2012-05-22	640.512	13	0	120	2.07918	0	0
2012-05-22	1	1	1	44	9	1	N	0	0	0	426.859	0	871	2.94002	0	0	2014-06-11	0	0	2014-09-30	861	0			0	0	0	1		1	0	0	0		2012-05-22	506.042	11	0	1710	3.233	0	0
2012-05-23	1	1	1	65	13		P	1	1	0	696.473	0	2530	3.40312	0	0	2014-07-09	0	0	2014-09-30	860	0			0	1	0	0		0	0	0	0		2012-05-23	647.768	13	0	40	1.60206	1	0
2012-05-24	1	0	1	63	13	2	N	0	0	0	289.879	0	4890000	6.68931	1	0	2014-06-25	0	0	2014-09-30	859	0			0	0	0	1		1	0	0	0		2012-05-24	251.607	6	0	40	1.60206	1	0
2012-05-24	1	1	1	40	8		N	0	0	0	251.011	0	20	1.30103	0	1	2014-06-27	0	0	2014-09-30	859	0			0	0	0	1		1	0	0	0		2012-05-24	204.379	5	0	40	1.60206	1	0
2012-05-24	1	1	1	51	11	1	N	0	0	0	586.489	0	20	1.30103	0	1	2014-06-27	0	0	2014-09-30	859	1	2001-10-03	3886	1	0	0	1		1	0	0	0		2012-05-24	531.067	11	0	6230	3.79449	0	0
2010-05-28	1	1	1	27	6	1	N	0	0	0	307.139	0	3170	3.50106	0	0	2013-09-13	1	2	2014-09-30	1586	1	2006-11-16	1289	1	0	0	1		0	0	0	0		2010-05-28	253.935	6	0	40	1.60206	1	0
2012-05-30	1	1	1	37	8		N	0	0	0	495.9	0	80	1.90309	0	0	2014-06-27	0	0	2014-09-30	853	0			0	0	0	1		1	0	0	0		2012-05-30	474.785	10	0	40	1.60206	1	0
2012-05-31	1	1	1	49	10	1	N	0	0	0	472.829	0	20	1.30103	0	1	2014-07-03	0	0	2014-09-30	852	0			0	0	0	1		1	0	0	0		2012-05-31	472.829	10	0
2012-05-31	1	1	1	37	8		N	0	0	0	378	0	46300	4.66558	0	0	2014-03-13	1	2	2014-09-30	852	0			0	0	0	0		0	0	0	0		2012-05-31	402	9	0	15700	4.1959	0	0
2012-05-31	1	1	1	25	5	1	N	0	0	0	600.624	0	20	1.30103	0	1	2014-07-15	0	0	2014-09-30	852	0			0	0	0	1		1	0	0	0		2012-05-31	600.624	13	0	972	2.98767	0	0
2012-06-04	1	1	1	28	6		N	0	0	0	365.933	0	972	2.98767	0	0	2014-06-25	0	0	2014-09-30	848	0			0	0	1	0	2012-05-29	1	0	0	1	acute HIV infection	2012-06-04	167	4	1	10000000	7	0	1
2012-06-05	1	1	1	27	6	1	N	0	0	0	288.256	0	1530	3.18469	0	0	2014-07-15	0	0	2014-09-30	847	0			0	0	0	1		1	0	0	0		2012-06-05	441.089	9	0	400	2.60206	0	0
2012-06-05	1	1	1	40	8	1	N	0	0	0	207.176	0	8570	3.93298	0	0	2014-05-18	0	0	2014-09-30	847	0			0	0	0	1		1	0	0	0		2012-06-05	469.727	10	0	40	1.60206	1	0
2012-06-05	1	1	1	39	8	1	N	0	0	0	800.316	0	40	1.60206	0	1	2014-07-08	0	0	2014-09-30	847	0			0	0	0	1		1	0	0	0		2012-06-05	800.316	16	0	78000	4.89209	0	0
2012-06-06	1	1	1	36	8		N	0	0	0	257.284	0	353	2.54777	0	0	2014-06-11	0	0	2014-09-30	846	0			0	0	0	0	2012-07-05	1	0	0	0		2012-06-06	26.544	1	1	2000000	6.30103	0	1
2012-06-06	1	1	1	21	5		N	0	0	0	798.66	0	242	2.38382	0	0	2013-11-07	1	2	2014-09-30	846	0			0	1	1	0	6/15/2012	1	0	0	0		2012-06-06	240.141	5	0	40	1.60206	1	0
2012-06-06	1	1	1	44	9	1	N	0	0	0	736.936	0	20	1.30103	0	1	2014-05-18	0	0	2014-09-30	846	0			0	0	0	1		1	0	0	0		2012-06-06	630.594	13	0	47700	4.67852	0	0
2012-06-06	1	1	1	28	6	1	N	0	0	0	461.58	0	378000	5.57749	1	0	2014-05-20	0	0	2014-09-30	846	0			0	0	0	0	2012-10-16	1	0	0	0		2012-06-06	400.982	9	0	6350	3.80277	0	0
2012-06-06	1	1	1	35	7		N	0	0	0	398.016	0	9190	3.96332	0	0	2014-04-17	0	0	2014-09-30	846	0			0	0	0	0		0	0	0	0		2012-06-06	345.283	7	0
2012-06-06	1	1	1	52	11		N	0	0	0	NA		NA				2012-08-10	1	2	2014-09-30	846	0			0	0	1	1	NA	1	0	0	0		2012-06-06				40	1.60206	1	0
2012-06-07	1	0	1	34	7	1	N	0	0	0	1435.21	0	20	1.30103	0	1	2014-07-03	0	0	2014-09-30	845	0			0	0	0	1		1	0	0	0		2012-06-07	1070.07	22	0	40	1.60206	1	0
2012-06-11	1	1	1	29	6	1	N	0	0	0	1080.12	0	20	1.30103	0	1	2014-05-04	0	0	2014-09-30	841	0			0	0	0	1		1	0	0	0		2012-06-11	717.44	15	0	52	1.716	0	0
2012-06-13	1	1	1	46	10		P	1	1	0	289.17	0	40	1.60206	0	1	2014-06-25	0	0	2014-09-30	839	1	2010-11-23	568	1	0	0	1		1	0	0	0		2012-06-13	165.923	4	1	21	1.32222	1	0
2012-06-13	1	1	1	25	5	1	N	0	0	0	570.969	0	1800	3.25527	0	0	2014-07-03	0	0	2014-09-30	839	0			0	0	0	0		0	0	0	0		2012-06-13	372	8	0	1990	3.29885	0	0
2012-06-13	1	1	1	32	7	1	N	0	0	0	448.63	0	20	1.30103	0	1	2014-05-13	0	0	2014-09-30	839	0			0	0	0	1		1	0	0	0		2012-06-13	345.821	7	0	40	1.60206	1	0
2012-06-14	1	1	1	32	7	1	N	0	0	0	833.448	0	20	1.30103	0	1	2014-07-17	0	0	2014-09-30	838	0			0	0	0	1		1	0	0	0		2012-06-14	772.632	16	0	71800	4.85612	0	0
2012-06-14	1	1	1	23	5	1	N	0	0	0	628.429	0	79000	4.89763	0	0	2013-12-31	1	2	2014-09-30	838	0			0	0	0	0		0	0	0	0		2012-06-14	415.38	9	0	40	1.60206	1	0
2012-06-14	1	1	1	34	7	3	N	0	0	0	775.22	0	40	1.60206	0	1	2014-07-10	0	0	2014-09-30	838	0			0	0	0	1		1	0	0	0		2012-06-14	815.043	17	0
2012-06-14	1	1	1	38	8		N	0	0	0	NA		NA				2014-06-10	0	0	2014-09-30	838	0			0	0	0	1		1	0	0	0		2012-06-14				40	1.60206	1	0
2012-06-18	1	1	1	46	10	1	N	0	0	0	439.086	0	20	1.30103	0	1	2014-05-04	0	0	2014-09-30	834	0			0	0	0	1		1	0	0	0		2012-06-18	439.086	9	0
2012-06-18	1	1	1	60	12	3	P	1	1	0	526	0	40	1.60206	0	1	2012-06-23	1	2	2014-09-30	834	0			0	0	1	1	6/13/2008	1	0	0	0		2012-06-18				44	1.64345	1	0
2012-06-18	1	1	1	33	7	1	N	0	0	0	956.148	0	20	1.30103	0	1	2014-05-27	0	0	2014-09-30	834	0			0	0	0	1		1	0	0	0		2012-06-18	726.71	15	0	40	1.60206	1	0
2012-06-19	1	1	1	73	15	2	N	0	0	0	968.266	0	20	1.30103	0	1	2014-05-04	0	0	2014-09-30	833	0			0	0	0	1		1	0	0	0		2012-06-19	732.281	15	0	40	1.60206	1	0
2012-07-05	1	1	1	26	6		N	0	0	0	55.4775	1	88	1.94448	0	0	2014-06-19	0	0	2014-09-30	817	0			0	0	1	0		1	1	0	0		2012-07-05	24	1	1	357000	5.55267	0	1
2012-07-11	1	1	1	45	9		N	0	0	0	199.711	1	36600	4.56348	0	0	2014-05-07	0	0	2014-09-30	811	0			0	0	1	0		1	0	0	1	Non-Hodgkin's lymphoma	2012-07-11
2012-07-12	1	1	1	32	7		N	0	0	0	546.48	0	20	1.30103	0	1	2014-06-21	0	0	2014-09-30	810	0			0	0	0	1		1	0	0	0		2012-07-12				40	1.60206	1	0
2012-08-09	1	1	1	44	9	1	P	1	1	0	428.61	0	20	1.30103	0	1	2014-07-10	0	0	2014-09-30	782	0			0	0	0	1	2/24/2006	1	0	0	0		2012-08-09	558.809	12	0	40	1.60206	1	0
2012-10-18	0	1	1	29	6		P	1	1	0	543.833	0	20	1.30103	0	1	2014-04-07	0	0	2014-09-30	712	1	2012-12-06	-49	0	0	0	1	8/16/2011	1	0	1	0		2012-10-18	409.795	9	0	1860	3.26951	0	0
2012-11-01	1	1	1	39	8		N	0	0	0	28.1952	1	20	1.30103	0	1	2014-06-25	0	0	2014-09-30	698	0			0	0	0	1		1	0	0	0		2012-11-01	141.232	3	1
2012-11-01	1	1	1	42	9		N	0	0	0	403.776	0	11800	4.07188	0	0	2014-07-15	0	0	2014-09-30	698	0			0	0	1	0	11/8/2012	1	1	0	1		2012-11-01				13000	4.11394	0	0
2012-11-15	1	1	1	54	11		P	1	1	0	256.984	0	13000	4.11394	0	0	2014-05-18	0	0	2014-09-30	684	0			0	1	1	0	11/19/2012	1	1	0	1		2012-11-15	256.984	6	0
2012-11-22	1	1	1	27	6		N	0	0	0	75	1	47	1.6721	0	1	2014-07-08	0	0	2014-09-30	677	0			0	0	1	0	11/25/2012	1	0	0	1	Disseminated Penicillium marneffei and Nocardia farcinica infection, involving the lymph nodes, liver, spleen, and bone marrow	2012-11-22				229000	5.35984	0	1
2012-12-19	0	1	1	49	10	1	P	1	1	0	71.8627	1	229000	5.35984	1	0	2014-05-27	0	0	2014-09-30	650	1	2012-12-20	-1	0	0	1	0		1	0	1	0		2012-12-19	71.8627	2	1
2013-01-03	1	1	1	35	7		N	0	0	0	0.485	1	288000	5.45939	1	0	2014-07-10	0	0	2014-09-30	635	0			0	1	1	0	1/9/2013	1	0	0	1	Penicillium marnefei infection with multiple lymphadenopathies and bilateral bronchus compression s/p Amphotericin B (1/1~1/10), Itraconazole (1/11~); CMV myelopathy s/p ganciclovir, valganciclovir	2013-01-03
2013-01-03	1	1	1	37	8		N	0	0	0	35.65	1	37200	4.57054	0	0	2013-09-03	1	2	2014-09-30	635	0			0	0	1	1	7/2/1905	1	0	0	0		2013-01-03				71	1.85126	0	0
2013-01-10	1	1	1	31	7		N	0	0	0	99.788	1	71	1.85126	0	0	2013-12-26	1	2	2014-09-30	628	0			0	0	1	1	12/21/2012	1	0	0	1	Right calf and knee hematoma, s/p I/D and pig-tail drainage and removal	2013-01-10	99.788	2	1	40	1.60206	1	0
2013-01-10	1	1	1	44	9	1	N	0	0	0	648.585	0	30	1.47712	0	1	2014-07-11	0	0	2014-09-30	628	0			0	0	1	1		1	0	0	1	Empyema of the right lung due to viridan streptococci s/p video-assisted thoracoscopic decortication on 2013/1/12, chest tube removal on 2013/1/22, 1/25, Avelox	2013-01-10	625.581	13	0
2013-01-10	1	1	1	39	8		N	0	0	0	228.01	0	120	2.07918	0	0	2014-05-11	0	0	2014-09-30	628	0			0	1	1	0	1/17/2013	1	1	0	1		2013-01-10
2013-01-31	1	1	1	34	7		N	0	0	0	NA		NA				2013-02-22	1	2	2014-09-30	607	0			0	0	1	1		1	0	0	1	NA	2013-01-31
2013-04-10	1	1	1	48	10		N	0	0	0	527	0	20	1.30103	0	1	2014-07-15	0	0	2014-09-30	538	0			0	1	1	1	2/28/2013	1	1	0	1	NA	2013-04-10				144	2.15836	0	0
2013-04-23	1	1	1	41	9		N	0	0	0	305.071	0	3940	3.5955	0	0	2014-07-10	0	0	2014-09-30	525	0			0	1	0	1	1/16/2013	1	1	0	1	Salmonella bacteremia	2013-04-23	531.082	11	0	40	1.60206	1	0
2013-05-20	1	1	1	52	11		N	0	0	0	74.0129	1	311	2.49276	0	0	2014-06-25	0	0	2014-09-30	498	0			0	0	1	1	1/25/2013	1	0	0	1	NA	2013-05-20	215.798	5	0	177	2.24797	0	0
2013-07-01	1	1	1	52	11		N	0	0	0	30.888	1	29	1.4624	0	1	2014-07-17	0	0	2014-09-30	456	0			0	0	0	1	6/6/2013	1	0	0	1	Meningioencephalitis, ventriculitis, caused by HSV, EBV	2013-07-01	86.688	2	1
2013-07-22	0	1	1	37	8		N	0	0	0	263.39	0	3350	3.52504	0	0	2014-06-11	0	0	2014-09-30	435	1	2013-07-23	-1	0	1	1	1	8/16/2013	1	1	1	1	Syphilis	2013-07-22				196000	5.29226	0	1
2013-07-22	0	0	1	32	7		P	1	1	0	254.668	0	414000	5.617	1	0	2014-07-08	0	0	2014-09-30	435	1	2013-05-17	66	0	0	0	1	5/10/2013	1	0	1	0		2013-07-22	411.232	9	0	40	1.60206	1	0
2013-08-12	0	1	1	50	10	3	P	1	1	0	94	1	20	1.30103	0	1	2014-07-10	0	0	2014-09-30	414	1	2013-07-31	12	0	0	1	1	12/1/2006	1	0	1	1	Salmonella (O9, group D) bacteremia, with pyomyocitis of the left thigh and septic arthritis of the left knee	2013-08-12	93.912	2	1	12800	4.10721	0	0
2011-12-19	1	1	1	49	10		N	0	0	0	NA		NA				2012-04-10	0	1	2014-09-30	113	0			0	0	1	1	NA	1	0	0			2011-12-19	105.696	3	1	40	1.60206	1	0
2011-06-16	1	1	1	56	12	1	N	0	0	0	250.47	0	40	1.60206	0	1	2014-04-28	0	0	2014-09-30	1202	1	1998-11-05	4606	1	0	0	1		1	0	0			2011-06-16	197.839	4	1	152	2.18184	0	0
2011-03-14	1	1	1	77	15	2	Indeterminate	2		1	369.27	0	20	1.30103	0	1	2014-05-27	0	0	2014-09-30	1296	0			0	0	0	0	2011-03-17	1	0	0			2011-03-14	282.124	6	0	40	1.60206	1	0
2011-11-15	1	0	1	59	12	2	P	1	1	0	709.162	0	20	1.30103	0	1	2014-05-18	0	0	2014-09-30	1050	0			0	0	0	1		1	0	0			2011-11-15	709.162	15	0
2011-07-28	1	1	1	44	9	1	N	0	0	0	NA		NA				2011-09-30	0	1	2014-09-30	64	1	2008-03-27	1218	1	0	1	0		0	0	0	1	Salmonellosis	2011-07-28	3.1964	1	1	322000	5.50786	0	1
2011-05-18	1	1	1	43	9		N	0	0	0	421.045	0	1610	3.20683	0	0	2014-07-17	0	0	2014-09-30	1231	0			0	0	0	0		1		0			2011-05-18	218.592	5	0	147000	5.16732	0	1
2011-11-17	1	1	1	39	8		N	0	0	0	385	0	86200	4.93551	0	0	2011-11-17	1	2	2014-09-30	1048	0			0	0	0	0		0		0			2011-11-17	395.018	8	0	102000	5.0086	0	1
2011-03-14	1	1	1	46	10		N	0	0	0	161.242	1	329	2.5172	0	0	2014-06-11	0	0	2014-09-30	1296	0			0	0	0	0		1		0			2011-03-14	45.0225	1	1	40	1.60206	1	0
2011-11-17	1	1	1	45	9		N	0	0	0	365.392	0	20	1.30103	0	1	2014-06-20	0	0	2014-09-30	1048	0			0	0	0	1		1		0			2011-11-17	365.392	8	0	40	1.60206	1	0
2011-08-18	1	1	1	45	9	1	N	0	0	0	807.828	0	20	1.30103	0	1	2014-06-27	0	0	2014-09-30	1139	0			0	0	0	1	2011-10-25	1	0	0			2011-08-18	758.248	16	0	40	1.60206	1	0
2011-11-01	1	1	1	47	10	1	N	0	0	0	402.678	0	20	1.30103	0	1	2014-05-18	0	0	2014-09-30	1064	0			0	0	0	1		1	0	0			2011-11-01	402.678	9	0	40	1.60206	1	0
2011-11-15	1	1	1	39	8	1	N	0	0	0	1514.83	0	20	1.30103	0	1	2014-07-15	0	0	2014-09-30	1050	0			0	0	0	1		1	0	0			2011-11-15	1387.9	28	0	40	1.60206	1	0
2011-05-31	1	1	1	70	14	2	N	0	0	0	252	0	20	1.30103	0	1	2014-07-02	0	0	2014-09-30	1218	0			0	0	0	1		1	0	0			2011-05-31	248.71	5	0	40	1.60206	1	0
2011-11-10	1	0	1	63	13	2	P	1	1	0	407.722	0	20	1.30103	0	1	2014-07-17	0	0	2014-09-30	1055	0			0	0	0	1		1	0	0			2011-11-10	496.56	10	0	77400	4.88874	0	0
2011-11-17	1	1	1	40	8	1	N	0	0	0	343.238	0	40900	4.61172	0	0	2014-07-10	0	0	2014-09-30	1048	0			0	0	0	0	2012-02-23	1	0	0			2011-11-17	275.94	6	0
2011-06-13	1	1	1	52	11		N	0	0	0	NA		NA				2011-06-15	0	1	2014-09-30	2	0			0	1	1	0		0	1	0			2011-06-13				1400	3.14613	0	0
2011-07-07	1	1	1	35	7		N	0	0	0	215.838	0	145	2.16137	0	0	2014-07-16	0	0	2014-09-30	1181	0			0	0	0	1		1	0	0			2011-07-07	273.182	6	0	81	1.90849	0	0
2011-11-01	1	1	1	48	10	1	N	0	0	0	689.208	0	20	1.30103	0	1	2014-06-13	0	0	2014-09-30	1064	0			0	0	0	1		1	0	0			2011-11-01	346.72	7	0	40	1.60206	1	0
2011-11-10	1	1	1	36	8	1	N	0	0	0	380.407	0	40	1.60206	0	1	2014-05-13	0	0	2014-09-30	1055	0			0	0	0	1		1	0	0			2011-11-10	380.407	8	0	2860	3.45637	0	0
2011-11-10	1	1	1	43	9	2	N	0	0	0	43.428	1	210000	5.32222	1	0	2014-06-20	0	0	2014-09-30	1055	0			0	0	0	1		1	0	0			2011-11-10	479.509	10	0	40	1.60206	1	0
2011-11-17	1	1	1	34	7	1	N	0	0	0	341.64	0	20	1.30103	0	1	2014-06-13	0	0	2014-09-30	1048	0			0	0	0	1		1	0	0			2011-11-17	341.64	7	0	40	1.60206	1	0
2011-11-17	1	1	1	41	9	1	N	0	0	0	487.099	0	20	1.30103	0	1	2014-05-20	0	0	2014-09-30	1048	0			0	0	0	1		1	0	0			2011-11-17	487.099	10	0	40	1.60206	1	0
2011-11-21	1	1	1	41	9	1	P	1	1	0	568.293	0	20	1.30103	0	1	2014-05-06	0	0	2014-09-30	1044	0			0	0	0	1		1	0	0			2011-11-21	529.639	11	0	40	1.60206	1	0
2011-12-15	1	1	1	43	9	1	N	0	0	0	617.882	0	20	1.30103	0	1	2014-07-17	0	0	2014-09-30	1020	0			0	0	0	1		1	0	0			2011-12-15	530.12	11	0	1200	3.07918	0	0
2011-09-06	1	1	1	30	6		N	0	0	0	220.702	0	287000	5.45788	1	0	2014-06-24	0	0	2014-09-30	1120	0			0	0	0	0		1	0	0			2011-09-06	587.618	12	0
2012-03-14	1	1	1	47	10		N	0	0	0	NA		NA				2014-08-13	0	0	2014-09-30	930	0			0	0	0	0		0	0	0	1	Chronic osteomyelitis	2012-03-14				75300	4.87679	0	0
2011-11-16	1	1	1	42	9		Indeterminate	2		1	508	0	20	1.30103	0	1	2014-07-10	0	0	2014-09-30	1049	0			0	0	0	0		1	0	0			2011-11-16	706.917	15	0	54200	4.734	0	0
2011-12-21	1	1	1	35	7		N	0	0	0	410.573	0	54200	4.734	0	0	2013-11-02	1	2	2014-09-30	1014	0			0	0	0	0		1	0	0			2011-12-21	66.6924	2	1	8140	3.91062	0	0
2011-12-14	1	1	1	39	8	1	N	0	0	0	321.062	0	1930	3.28556	0	0	2014-04-21	0	0	2014-09-30	1021	0			0	0	0	0	2012-01-10	1	0	0			2011-12-14	229.265	5	0	40	1.60206	1	0
2011-12-28	1	1	1	57	12	2	N	0	0	0	638.719	0	20	1.30103	0	1	2014-07-21	0	0	2014-09-30	1007	0			0	0	0	1		1	0	0			2011-12-28	502.096	11	0	40	1.60206	1	0
2011-11-15	1	1	1	59	12	1	N	0	0	0	1263.17	0	20	1.30103	0	1	2014-07-08	0	0	2014-09-30	1050	0			0	0	0	1		1	0	0			2011-11-15	1263.17	25	0	9680000	6.98588	0	1
2011-08-31	1	1	1	22	5	1	N	0	0	0	1242.37	0	20	1.30103	0	1	2014-07-27	0	0	2014-09-30	1126	0			0	0	0	0	2011-09-08	1	0	0			2011-08-31	958.664	20	0	40	1.60206	1	0
2011-11-10	1	1	1	48	10	1	P	1	1	0	606.08	0	20	1.30103	0	1	2014-06-13	0	0	2014-09-30	1055	1	1999-01-25	4672	1	0	0	1		1	0	0			2011-11-10	606.08	13	0	22400	4.35025	0	0
2011-03-24	1	1	1	53	11		N	0	0	0	6.516	1	40	1.60206	0	1	2014-05-06	0	0	2014-09-30	1286	0			0	1	1	0		1	1	0			2011-03-24	3.123	1	1	53	1.72428	0	0
2011-12-06	1	1	1	38	8	1	P	1	1	0	855.14	0	53	1.72428	0	0	2014-06-25	0	0	2014-09-30	1029	0			0	0	0	1		1	0	0			2011-12-06	855.14	18	0	10500	4.02119	0	0
2011-10-26	1	1	1	33	7		N	0	0	0	165.428	1	131	2.11727	0	0	2014-05-06	0	0	2014-09-30	1070	0			0	0	1	1		1	0	0	1	CAP	2011-10-26	86.4144	2	1
2011-11-07	1	1	1	72	15	2	N	0	0	0	522.755	0	20	1.30103	0	1	2014-06-18	0	0	2014-09-30	1058	0			0	0	1	1		1	0	0	1	CAP	2011-11-07				38600	4.58659	0	0
2011-06-16	1	1	1	43	9	1	N	0	0	0	561.384	0	26600	4.42488	0	0	2014-07-10	0	0	2014-09-30	1202	0			0	0	0	0		1	0	0			2011-06-16	665.496	14	0	34800	4.54158	0	0
2011-12-19	1	1	1	39	8		N	0	0	0	375.066	0	150	2.17609	0	0	2014-05-06	0	0	2014-09-30	1016	0			0	0	0	0	2011-12-27	1	0	0			2011-12-19	210.14	5	0	40	1.60206	1	0
2011-11-03	1	1	1	42	9	1	P	1	1	0	1051.99	0	20	1.30103	0	1	2014-07-15	0	0	2014-09-30	1062	0			0	0	0	1		1	0	0			2011-11-03	1327.14	26	0
2011-11-24	1	1	1	39	8	1	N	0	0	0	45.3108	1	68200	4.83378	0	0	2011-12-22	1	2	2014-09-30	1041	1	2005-11-28	2187	1	0	0	1		1	0	0			2011-11-24				1230	3.08991	0	0
2011-10-13	1	1	1	49	10		N	0	0	0	189.766	1	1230	3.08991	0	0	2014-06-13	0	0	2014-09-30	1083	0			0	0	0	1		1	0	0			2011-10-13	189.766	4	1	1140000	6.0569	0	1
2011-11-24	1	1	1	32	7		N	0	0	0	329.991	0	189000	5.27646	1	0	2014-07-17	0	0	2014-09-30	1041	0			0	0	0	0		1	0	0			2011-11-24	365.002	8	0	52	1.716	0	0
2011-11-08	1	1	1	35	7		N	0	0	0	795.968	0	40	1.60206	0	1	2014-06-13	0	0	2014-09-30	1057	0			0	0	0	1		1	0	0			2011-11-08	487	10	0	55	1.74036	0	0
2011-11-24	1	1	1	44	9	1	N	0	0	0	554.587	0	20	1.30103	0	1	2014-06-20	0	0	2014-09-30	1041	0			0	0	0	1		1	0	0			2011-11-24	554.587	12	0	40	1.60206	1	0
2011-11-02	1	1	1	50	10	1	P	1	1	0	959.109	0	20	1.30103	0	1	2014-05-06	0	0	2014-09-30	1063	0			0	0	0	1		1	0	0			2011-11-02	1050.34	21	0	40	1.60206	1	0
2011-11-08	1	1	1	45	9	1	N	0	0	0	670.348	0	20	1.30103	0	1	2014-07-01	0	0	2014-09-30	1057	0			0	0	0	1		1	0	0			2011-11-08	564.822	12	0	40	1.60206	1	0
2011-11-08	1	1	1	49	10	1	N	0	0	0	604.901	0	20	1.30103	0	1	2014-07-01	0	0	2014-09-30	1057	0			0	0	0	1		1	0	0			2011-11-08	86.3654	2	1	40	1.60206	1	0
2011-12-28	1	1	1	49	10	1	N	0	0	0	557.13	0	20	1.30103	0	1	2014-05-18	0	0	2014-09-30	1007	0			0	0	0	1		1	0	0			2011-12-28	580	12	0
2011-08-22	1	1	1	36	8	1	N	0	0	0	239.473	0	40	1.60206	0	1	2014-08-17	0	0	2014-09-30	1135	0			0	0	0	1		1	0	0			2011-08-22	239.473	5	0	56400	4.75128	0	0
2011-08-17	1	1	1	34	7		N	0	0	0	551.294	0	244000	5.38739	1	0	2014-05-21	0	0	2014-09-30	1140	0			0	0	0	0		1	0	0			2011-08-17	475.755	10	0	67900	4.83187	0	0
2011-11-24	1	1	1	35	7	1	N	0	0	0	591.192	0	86	1.9345	0	0	2014-05-04	0	0	2014-09-30	1041	0			0	0	0	1		1	0	0			2011-11-24	456.586	10	0	40	1.60206	1	0
2011-11-08	1	1	1	53	11		N	0	0	0	523.36	0	42	1.62325	0	1	2014-05-18	0	0	2014-09-30	1057	0			0	0	0	1		1	0	0			2011-11-08	493.536	10	0	40	1.60206	1	0
2011-12-27	1	1	1	48	10	1	N	0	0	0	767.175	0	20	1.30103	0	1	2014-05-04	0	0	2014-09-30	1008	0			0	0	0	1		0	0	0			2011-12-27	901.247	19	0	40	1.60206	1	0
2011-12-27	1	1	1	45	9	1	P	1	1	0	670.37	0	20	1.30103	0	1	2014-07-25	0	0	2014-09-30	1008	1	2010-08-16	498	1	0	0	1		1	0	0			2011-12-27	670.37	14	0	40	1.60206	1	0
2011-12-20	1	1	1	41	9	1	N	0	0	0	416.97	0	20	1.30103	0	1	2014-05-12	0	0	2014-09-30	1015	0			0	0	0	1		1	0	0			2011-12-20	416.97	9	0	40	1.60206	1	0
2011-06-16	1	1	1	59	12	1	N	0	0	0	29.34	1	20	1.30103	0	1	2014-06-13	0	0	2014-09-30	1202	0			0	0	0	1		1	0	0			2011-06-16	29.34	1	1	1630	3.21219	0	0
2011-07-27	1	1	1	30	6	1	P	1	1	0	412.805	0	20	1.30103	0	1	2014-06-26	0	0	2014-09-30	1161	1	2006-11-07	1723	1	0	0	1		1	0	0			2011-07-27	6.7035	1	1	40	1.60206	1	0
2011-11-15	1	1	1	50	10	1	N	0	0	0	305.334	0	20	1.30103	0	1	2013-12-03	1	2	2014-09-30	1050	0			0	0	0	1		1	0	0			2011-11-15	433.238	9	0	22800	4.35793	0	0
2011-12-07	1	1	1	36	8		N	0	0	0	718	0	20	1.30103	0	1	2014-06-20	0	0	2014-09-30	1028	0			0	0	0	0	2012-01-03	1	0	0			2011-12-07	616.479	13	0	51300	4.71012	0	0
2011-11-08	1	0	1	34	7	3	N	0	0	0	354.51	0	51300	4.71012	0	0	2013-11-20	1	2	2014-09-30	1057	0			0	0	0	0		1	0	0			2011-11-08	438	9	0	51300	4.71012	0	0
2013-09-17	1	1	1	46	10	1	N	0	0	0	950.727	0	20	1.30103	0	1	2014-06-13	0	0	2014-09-30	378	0			0	0	0	0	2013-09-12	1	0	0			2013-09-17	622.74	13	0	12700	4.1038	0	0
2011-03-15	1	1	1	28	6	1	N	0	0	0	7.932	1	12700	4.1038	0	0	2011-05-26	1	2	2014-09-30	1295	0			0	0	1	0		1		0			2011-03-15	7.932	1	1
2011-06-14	1	1	1	40	8		N	0	0	0	126.232	1	1570	3.1959	0	0	2014-06-11	0	0	2014-09-30	1204	0			0	0	1	0	2011-06-14	1	1	0			2011-06-14	5.776	1	1	79	1.89763	0	0
2011-05-30	1	1	1	40	8	1	N	0	0	0	0	1	79	1.89763	0	0	2011-08-11	0	1	2014-09-30	73	1	2006-08-09	1755	1	0	1	0		1	1	0			2011-05-30	184.302	4	1	6770	3.83059	0	0
2011-11-16	1	1	1	35	7	1	N	0	0	0	402.261	0	20	1.30103	0	1	2014-05-11	0	0	2014-09-30	1049	0			0	0	0	1		1	0	0			2011-11-16	372.103	8	0	12600	4.10037	0	0
2011-09-01	1	1	1	43	9	1	P	1	1	0	316.912	0	18200	4.26007	0	0	2014-04-28	0	0	2014-09-30	1125	0			0	0	0	0	9/17/2013	1	0	0			2011-09-01	285.542	6	0	40	1.60206	1	0
2011-12-27	1	1	1	41	9	1	N	0	0	0	718.4	0	20	1.30103	0	1	2014-04-08	0	0	2014-09-30	1008	0			0	0	0	1		1	0	0			2011-12-27	718.4	15	0	105	2.02119	0	0
2011-11-20	1	1	1	38	8	1	Indeterminate	2		1	580	0	20	1.30103	0	1	2014-07-22	0	0	2014-09-30	1045	0			0	0	1	1	2011-10-13	1	0	0	1	adenovirus upper respiratory tract infection	2011-11-20	214.24	5	0	28300	4.45179	0	0
2011-07-27	1	1	1	29	6		N	0	0	0	420.946	0	27900	4.4456	0	0	2012-07-06	1	2	2014-09-30	1161	0			0	0	0	0		0	0	0			2011-07-27	252.101	6	0	40	1.60206	1	0
2010-08-08	1	1	1	36	8	1	P	1	1	0	719.026	0	20	1.30103	0	1	2014-07-03	0	0	2014-09-30	1177	1	2011-07-11	-337	0	0	0	1		1	0	0			2010-08-08	719.026	15	0	40	1.60206	1	0
2011-12-15	1	1	1	39	8	2	N	0	0	0	334.464	0	20	1.30103	0	1	2014-07-10	0	0	2014-09-30	1020	0			0	0	0	1		1	0	0			2011-12-15	334.464	7	0	40	1.60206	1	0
2011-10-26	1	1	1	34	7		N	0	0	0	455.598	0	40	1.60206	0	1	2014-05-06	0	0	2014-09-30	1070	0			0	0	0	1		1	0	0			2011-10-26	372.24	8	0	101000	5.00432	0	1
2011-11-23	1	1	1	31	7	1	N	0	0	0	49.2228	1	67	1.82607	0	0	2014-07-08	0	0	2014-09-30	1042	0			0	0	0	1		1	0	0			2011-11-23	9.108	1	1	40	1.60206	1	0
2011-11-17	1	1	1	29	6	1	N	0	0	0	556.319	0	20	1.30103	0	1	2014-07-19	0	0	2014-09-30	1048	0			0	0	0	1		1	0	0			2011-11-17	645.454	13	0	21800	4.33846	0	0
2011-09-29	1	1	1	33	7		N	0	0	0	618.078	0	13200	4.12057	0	0	2013-12-12	1	2	2014-09-30	1097	0			0	0	0	0		0	0	0			2011-09-29	368.699	8	0	40	1.60206	1	0
2011-11-16	1	1	1	24	5	1	N	0	0	0	883.646	0	20	1.30103	0	1	2014-05-13	0	0	2014-09-30	1049	0			0	0	0	1		1	0	0			2011-11-16	714.979	15	0	40	1.60206	1	0
2011-12-20	1	1	1	36	8	1	N	0	0	0	612.174	0	20	1.30103	0	1	2014-06-25	0	0	2014-09-30	1015	0			0	0	0	1		1	0	0			2011-12-20	704.172	15	0	40	1.60206	1	0
2011-09-15	1	1	1	30	6	1	N	0	0	0	470.254	0	20	1.30103	0	1	2013-12-26	1	2	2014-09-30	1111	0			0	0	0	1		1	0	0			2011-09-15	409.658	9	0	14900	4.17319	0	0
2011-08-25	1	1	1	33	7		N	0	0	0	421.546	0	11800	4.07188	0	0	2014-06-21	0	0	2014-09-30	1132	0			0	0	0	0		0	0	0			2011-08-25	316.778	7	0	40	1.60206	1	0
2011-11-15	1	1	1	39	8	1	N	0	0	0	567.424	0	20	1.30103	0	1	2014-06-11	0	0	2014-09-30	1050	0			0	0	0	1		1	0	0			2011-11-15	649.584	13	0	40	1.60206	1	0
2011-12-08	1	1	1	37	8	1	Indeterminate	2		1	933.888	0	20	1.30103	0	1	2014-07-10	0	0	2014-09-30	1027	0			0	0	0	1		1	0	0			2011-12-08	933.888	19	0
2011-12-21	1	1	1	44	9	3	N	0	0	0	135	1	20	1.30103	0	1	2011-12-21	0	0	2014-09-30	1014	0	2005/7/8 (excluded)		0	0	0	0		1	0	0			2011-12-21				7940	3.89982	0	0
2011-08-25	1	1	1	29	6		N	0	0	0	499.414	0	13700	4.13672	0	0	2014-04-14	0	0	2014-09-30	1132	0			0	0	0	0		0	0	0			2011-08-25	472.32	10	0	8850	3.94694	0	0
2011-11-24	1	1	1	47	10	1	N	0	0	0	567.472	0	81500	4.91116	0	0	2014-06-26	0	0	2014-09-30	1041	0			0	0	0	0	2/13/2014	1	0	0			2011-11-24	649.018	13	0	217	2.33646	0	0
2011-12-12	1	1	1	22	5	1	N	0	0	0	586.329	0	7490	3.87448	0	0	2014-05-16	0	0	2014-09-30	1023	0			0	0	0	1		1	0	0			2011-12-12	743.865	15	0	40	1.60206	1	0
2011-11-17	1	1	1	55	11	2	N	0	0	0	404.83	0	40	1.60206	0	1	2014-04-24	0	0	2014-09-30	1048	0			0	0	0	1		1	0	0			2011-11-17	404.83	9	0	40	1.60206	1	0
2011-04-19	1	1	1	47	10		N	0	0	0	339.23	0	150	2.17609	0	0	2011-04-20	0	1	2014-09-30	1	0			0	0	1	0		1	1	0			2011-04-19	552.081	12	0	20	1.30103	1	0
2011-12-21	1	1	1	34	7	1	N	0	0	0	296	0	20	1.30103	0	1	2014-04-24	0	0	2014-09-30	1014	1	2006-02-10	2140	1	0	0	0	2011-12-27	1	0	0			2011-12-21	0	1	1	52000	4.716	0	0
2011-11-16	1	1	1	27	6	1	N	0	0	0	789.792	0	30400	4.48287	0	0	2014-04-24	0	0	2014-09-30	1049	0			0	0	0	0		1	0	0			2011-11-16	655.398	14	0	54700	4.73799	0	0
2011-12-27	1	1	1	38	8	1	N	0	0	0	622.486	0	97400	4.98856	0	0	2014-06-21	0	0	2014-09-30	1008	0			0	0	0	0		1	0	0			2011-12-27	845.163	17	0	40	1.60206	1	0
2011-11-10	1	1	1	72	15	2	N	0	0	0	175.812	1	20	1.30103	0	1	2014-05-15	0	0	2014-09-30	1055	0			0	0	0	1		1	0	0			2011-11-10	155.371	4	1	22900	4.35984	0	0
2011-09-15	1	1	1	27	6	1	N	0	0	0	131.147	1	385	2.58546	0	0	2012-08-23	1	2	2014-09-30	1111	0			0	0	0	0	2011-09-22	0	0	0			2011-09-15	73.1172	2	1	58	1.76343	0	0
2011-11-24	1	1	1	41	9	1	N	0	0	0	514.555	0	58	1.76343	0	0	2014-07-03	0	0	2014-09-30	1041	0			0	0	0	1		1	0	0			2011-11-24	514.555	11	0	71	1.85126	0	0
2011-12-07	1	1	1	36	8	2	N	0	0	0	620.557	0	20	1.30103	0	1	2014-06-24	0	0	2014-09-30	1028	0			0	0	0	1		1	0	0			2011-12-07	504.305	11	0	745	2.87216	0	0
2011-10-05	1	1	1	45	9	1	P	1	1	0	131	1	1511	3.17926	0	0	2013-11-16	1	2	2014-09-30	1091	1	2010-09-10	390	1	0	1	1		1	0	0			2011-10-05	88.693	2	1
2011-05-27	1	1	1	27	6		P	1	1	0	139	1	149000	5.17319	1	0	2013-06-20	1	2	2014-09-30	1222	1	2009-12-18	525	1	0	0	1		1	0	0			2011-05-27	375.936	8	0	60	1.77815	0	0
2011-11-10	1	1	1	23	5	1	P	1	1	0	688.225	0	71	1.85126	0	0	2014-05-29	0	0	2014-09-30	1055	0			0			1		1		0			2011-11-10	663.084	14	0	40	1.60206	1	0
2011-11-15	1	1	1	28	6	1	N	0	0	0	368.577	0	20	1.30103	0	1	2014-05-06	0	0	2014-09-30	1050	0			0	0	0	1		1	0	0			2011-11-15	296.112	6	0	40	1.60206	1	0
2011-11-10	1	1	1	33	7	1	P	1	1	0	431.101	0	20	1.30103	0	1	2014-07-08	0	0	2014-09-30	1055	0			0	0	0	1		1	0	0			2011-11-10	389.62	8	0
2012-05-16	1	1	1	66	14		N	0	0	0	NA		NA				2014-09-11	0	0	2014-09-30	867	0			0	0	0	0		0	0	0			2012-05-16				82	1.91381	0	0
2011-11-09	1	1	1	39	8	1	N	0	0	0	397.826	0	34200	4.53403	0	0	2014-06-05	0	0	2014-09-30	1056	0			0	0	0	0		1	0	0			2011-11-09	580.003	12	0	40	1.60206	1	0
2011-10-19	1	1	1	29	6	1	N	0	0	0	629	0	20	1.30103	0	1	2014-06-05	0	0	2014-09-30	1077	0			0	0	0	1		1	0	0			2011-10-19	343.778	7	0	46400	4.66652	0	0
2011-12-14	1	1	1	29	6		N	0	0	0	588.026	0	28000	4.44716	0	0	2014-05-29	0	0	2014-09-30	1021	0			0	0	0	0		1	0	0			2011-12-14	503.73	11	0	183000	5.26245	0	1
2011-09-06	1	1	1	30	6		N	0	0	0	344.167	0	89400	4.95134	0	0	2014-07-05	0	0	2014-09-30	1120	0			0			0		1		0			2011-09-06	300.45	6	0	40	1.60206	1	0
2011-11-03	1	1	1	25	5	1	N	0	0	0	30.976	1	127	2.1038	0	0	2014-06-05	0	0	2014-09-30	1062	0			0	0	0	1		1	0	0			2011-11-03	561.568	12	0	70800	4.85003	0	0
2011-11-10	1	1	1	39	8		N	0	0	0	201.18	0	79900	4.90255	0	0	2014-06-21	0	0	2014-09-30	1055	0			0	0	0	0		1	0	0			2011-11-10	201	5	0	79900	4.90255	0	0
2011-12-27	1	1	1	38	8	1	P	1	1	0	453.245	0	20	1.30103	0	1	2014-06-03	0	0	2014-09-30	1008	1	2008-03-27	1370	1	0	0	1		1	0	0			2011-12-27	356.693	8	0	40	1.60206	1	0
2011-11-08	1	1	1	28	6	1	N	0	0	0	743.82	0	20	1.30103	0	1	2014-05-29	0	0	2014-09-30	1057	0			0	0	0	1		1	0	0			2011-11-08	364.134	8	0	40	1.60206	1	0
2011-12-26	1	1	1	34	7	1	N	0	0	0	626.783	0	20	1.30103	0	1	2014-07-03	0	0	2014-09-30	1009	0			0	0	0	1		1	0	0			2011-12-26	356.693	8	0	40	1.60206	1	0
2011-05-18	1	1	1	29	6	1	N	0	0	0	603.509	0	20	1.30103	0	1	2014-05-27	0	0	2014-09-30	1231	0			0	0	0	1		1	0	0			2011-05-18	493.062	10	0	21200	4.32634	0	0
2011-08-18	1	1	1	29	6		N	0	0	0	275.769	0	21200	4.32634	0	0		1	2	2014-09-30	1139	0			0	0	0	0		0	0	0			2011-08-18	275.769	6	0	40	1.60206	1	0
2011-11-08	1	1	1	61	13	2	N	0	0	0	634	0	20	1.30103	0	1	2014-07-01	0	0	2014-09-30	1057	0			0	0	0	1		1	0	0			2011-11-08	428.001	9	0	2280	3.35793	0	0
2011-12-13	1	1	1	22	5	1	N	0	0	0	599.692	0	1680	3.22531	0	0	2014-06-26	0	0	2014-09-30	1022	0			0	0	0	0		0	0	0			2011-12-13	218	5	0	2280	3.35793	0	0
2011-08-24	1	1	1	23	5	1	N	0	0	0	537.065	0	11000	4.04139	0	0	2014-05-06	0	0	2014-09-30	1133	0			0	0	0	0		0	0	0			2011-08-24	466.528	10	0
2011-12-14	1	1	1	27	6	1	N	0	0	0	469.788	0	20	1.30103	0	1	2014-05-31	0	0	2014-09-30	1021	0			0	0	0	1		1	0	0			2011-12-14	527.582	11	0	20	1.30103	1	0
2011-12-15	1	1	1	37	8		N	0	0	0	349.802	0	160000	5.20412	1	0	2014-07-05	0	0	2014-09-30	1020	0			0	0	0	0		1	0	0			2011-12-15	650.76	14	0	10400	4.01703	0	0
2011-07-27	1	1	1	31	7	1	N	0	0	0	348.128	0	4910	3.69108	0	0	2014-08-29	0	0	2014-09-30	1161	0			0	0	0	0		0	0	0			2011-07-27	369.374	8	0	40	1.60206	1	0
2011-12-28	1	1	1	40	8	1	Indeterminate	2		1	346.733	0	20	1.30103	0	1	2014-07-10	0	0	2014-09-30	1007	0			0	0	0	1		1	0	0			2011-12-28	458.784	10	0	40	1.60206	1	0
2011-11-17	1	1	1	23	5	1	N	0	0	0	335.639	0	20	1.30103	0	1	2014-06-11	0	0	2014-09-30	1048	0			0	0	0	1		1	0	0			2011-11-17	483.189	10	0	40	1.60206	1	0
2011-08-18	1	1	1	23	5	1	N	0	0	0	433.48	0	20	1.30103	0	1	2014-05-29	0	0	2014-09-30	1139	0			0	0	0	1		1	0	0			2011-08-18	797.198	16	0	40	1.60206	1	0
2011-11-17	1	1	1	53	11		N	0	0	0	385.506	0	45	1.65321	0	1	2014-05-06	0	0	2014-09-30	1048	0			0	0	0	1		1	0	0			2011-11-17	350.761	8	0	22500	4.35218	0	0
2011-11-09	1	1	1	31	7		N	0	0	0	434.732	0	44500	4.64836	0	0	2014-05-27	0	0	2014-09-30	1056	0			0	0	0	0		1	0	0			2011-11-09	420.555	9	0	128	2.10721	0	0
2011-07-25	1	1	1	36	8		N	0	0	0	477	0	31	1.49136	0	1	2014-07-29	0	0	2014-09-30	1163	0			0	0	0	0	5/7/2012	1	0	0			2011-07-25	400.488	8	0	53900	4.73159	0	0
2011-11-10	1	1	1	26	6	1	P	1	1	0	265.127	0	1010	3.00432	0	0	2014-05-15	0	0	2014-09-30	1055	0			0	0	0	1		1	0	0			2011-11-10	175.968	4	1	17700	4.24797	0	0
2011-10-19	1	1	1	24	5	4	N	0	0	0	606.054	0	24400	4.38739	0	0	2014-06-21	0	0	2014-09-30	1077	0			0	0	0	0		1	0	0			2011-10-19	422.883	9	0	10000	4	0	0
2011-11-10	1	1	1	30	6		N	0	0	0	446.578	0	397	2.59879	0	0	2014-05-08	0	0	2014-09-30	1055	0			0	0	0	0	2011-11-10	1	0	0			2011-11-10	201.94	5	0
2011-09-26	1	1	1	28	6		N	0	0	0	NA		NA				2011-09-26	1	2	2014-09-30	1100	0			0			0		0		0			2011-09-26				54	1.73239	0	0
2011-06-21	1	1	1	31	7		N	0	0	0	457.65	0	20	1.30103	0	1	2014-05-20	0	0	2014-09-30	1197	0			0	0	0	1		1	0	0			2011-06-21	505.894	11	0	15500	4.19033	0	0
2011-08-18	1	1	1	32	7		N	0	0	0	374.756	0	11000	4.04139	0	0	2014-05-01	0	0	2014-09-30	1139	0			0	0	0	0		1	0	0			2011-08-18	314.352	7	0	18100	4.25768	0	0
2011-09-28	1	1	1	22	5	1	N	0	0	0	265.224	0	8180	3.91275	0	0	2014-07-03	0	0	2014-09-30	1098	0			0	0	0	0		1	0	0			2011-09-28	427.066	9	0	16500	4.21748	0	0
2011-08-25	1	1	1	30	6		N	0	0	0	361.215	0	24800	4.39445	0	0	2014-04-29	0	0	2014-09-30	1132	0			0	0	0	0		1	0	0			2011-08-25	419.608	9	0	52700	4.72181	0	0
2011-11-07	1	1	1	25	5	1	N	0	0	0	568.4	0	49400	4.69373	0	0	2014-06-21	0	0	2014-09-30	1058	0			0	0	0	0		0	0	0			2011-11-07	497	10	0	26600	4.42488	0	0
2011-11-30	1	1	1	39	8		N	0	0	0	458	0	26	1.41497	0	1	2014-07-22	0	0	2014-09-30	1035	0			0	0	0	1		1	0	0			2011-11-30	440.847	9	0	53	1.72428	0	0
2011-10-11	1	1	1	25	5	1	N	0	0	0	952.469	0	40	1.60206	0	1	2014-07-19	0	0	2014-09-30	1085	0			0	0	0	1		0	0	0			2011-10-11	1488.58	30	0	96300	4.98363	0	0
2011-10-18	1	1	1	25	5	1	N	0	0	0	435.826	0	117000	5.06819	1	0	2013-09-11	1	2	2014-09-30	1078	0			0	0	0	0		0	0	0			2011-10-18	512	11	0	96300	4.98363	0	0
2011-08-18	1	1	1	31	7		N	0	0	0	431.39	0	74400	4.87157	0	0	2014-07-17	0	0	2014-09-30	1139	0			0	0	0	0		0	0	0			2011-08-18	517.344	11	0	137	2.13672	0	0
2011-11-09	1	1	1	33	7		N	0	0	0	586.328	0	40	1.60206	0	1	2014-06-10	0	0	2014-09-30	1056	0			0	0	0	1		1	0	0			2011-11-09	622.934	13	0	67	1.82607	0	0
2011-12-27	1	1	1	22	5	4	N	0	0	0	942.347	0	377	2.57634	0	0	2014-07-10	0	0	2014-09-30	1008	0			0	0	0	1		1	0	0			2011-12-27	814.09	17	0	255	2.40654	0	0
2011-10-11	1	1	1	30	6		N	0	0	0	330.97	0	754	2.87737	0	0	2014-06-17	0	0	2014-09-30	1085	0			0	0	0	1		1	0	0			2011-10-11	471.786	10	0	237	2.37475	0	0
2011-07-15	1	1	1	25	5	1	N	0	0	0	250.194	0	144000	5.15836	1	0	2014-05-01	0	0	2014-09-30	1173	0			0	0	0	1		1	0	0			2011-07-15	321.826	7	0	40	1.60206	1	0
2011-11-10	1	1	1	33	7		N	0	0	0	338.249	0	49	1.6902	0	1	2014-06-26	0	0	2014-09-30	1055	0			0	0	0	0		1	0	0			2011-11-10	145.517	3	1	5950	3.77452	0	0
2011-11-10	1	1	1	31	7		P	1	1	0	732.394	0	2280	3.35793	0	0	2014-08-07	0	0	2014-09-30	1055	0			0	0	0	0		0	0	0			2011-11-10	597.661	12	0	82200	4.91487	0	0
2011-11-02	1	1	1	25	5	1	N	0	0	0	351.912	0	27700	4.44248	0	0	2014-05-03	0	0	2014-09-30	1063	0			0	0	0	0		0	0	0			2011-11-02	381.78	8	0	37300	4.57171	0	0
2011-11-24	1	1	1	41	9		N	0	0	0	380.441	0	17300	4.23805	0	0	2014-06-26	0	0	2014-09-30	1041	0			0	0	0	0		1	0	0			2011-11-24	361.413	8	0	53	1.72428	0	0
2011-03-14	1	1	1	68	14		N	0	0	0	1016.09	0	40	1.60206	0	1	2014-05-21	0	0	2014-09-30	1296	0			0	0	1	1		1	0	0	1	CAP	2011-03-14	529.074	11	0	75400	4.87737	0	0
2011-11-03	1	1	1	31	7		N	0	0	0	345.946	0	68000	4.83251	0	0	2014-05-17	0	0	2014-09-30	1062	0			0	0	0	0		1	0	0			2011-11-03	337.082	7	0	182000	5.26007	0	1
2011-10-18	1	1	1	21	5	1	N	0	0	0	488.72	0	155000	5.19033	1	0	2014-06-12	0	0	2014-09-30	1078	0			0	0	0	0		1	0	0			2011-10-18	473	10	0	182000	5.26007	0	1
2011-08-18	1	1	1	22	5	1	N	0	0	0	285.304	0	473	2.67486	0	0	2014-06-05	0	0	2014-09-30	1139	0			0	0	0	0	2011-08-18	1	0	0			2011-08-18	24	1	1	1840000	6.26482	0	1
2011-06-21	1	1	1	56	12		N	0	0	0	NA		NA				2013-03-20	1	2	2014-09-30	1197	0			0			0		0		0			2011-06-21				42600	4.62941	0	0
2011-10-18	1	1	1	26	6	1	N	0	0	0	681.59	0	31600	4.49969	0	0	2011-10-18	1	2	2014-09-30	1078	0			0	0	0	0		0	0	0			2011-10-18	420.166	9	0
2011-12-08	1	1	1	27	6	1	N	0	0	0	382.548	0	94	1.97313	0	0	2014-06-05	0	0	2014-09-30	1027	0			0	0	0	1		1	0	0			2011-12-08	382.548	8	0	94	1.97313	0	0
2011-07-15	1	1	1	30	6		N	0	0	0	303.048	0	40	1.60206	0	1	2014-06-19	0	0	2014-09-30	1173	0			0	0	0	1		1	0	0			2011-07-15	285.586	6	0	40	1.60206	1	0
2011-10-18	1	1	1	30	6		N	0	0	0	944.88	0	5410	3.7332	0	0	2014-06-24	0	0	2014-09-30	1078	0			0	0	0	0		1	0	0			2011-10-18	725.66	15	0	5160	3.71265	0	0
2011-10-18	1	1	1	38	8		N	0	0	0	379.494	0	3300	3.51851	0	0	2014-06-03	0	0	2014-09-30	1078	0			0	0	0	0		1	0	0			2011-10-18	342.202	7	0	3410	3.53275	0	0
2011-11-16	1	1	1	36	8		N	0	0	0	291.373	0	503	2.70157	0	0	2013-08-28	1	2	2014-09-30	1049	0			0	0	0	0	5/22/2014	1	0	0			2011-11-16	330.31	7	0	771	2.88705	0	0
2011-10-26	1	1	1	30	6		N	0	0	0	329.526	0	711	2.85187	0	0	2014-04-29	0	0	2014-09-30	1070	0			0	1	0	0	2011-12-13	1	0	0			2011-10-26	46	1	1	364000	5.5611	0	1
2011-12-14	1	1	1	29	6	1	N	0	0	0	279.306	0	20	1.30103	0	1	2014-05-15	0	0	2014-09-30	1021	0			0	0	0	1		1	0	0			2011-12-14	222.132	5	0	40	1.60206	1	0
2011-08-18	1	1	1	37	8		N	0	0	0	550.658	0	2970	3.47276	0	0	2014-07-17	0	0	2014-09-30	1139	0			0	0	0	0		0	0	0			2011-08-18	614	13	0	3560	3.55145	0	0
2011-03-24	1	1	1	25	5	1	N	0	0	0	361.131	0	23300	4.36736	0	0	2014-05-01	0	0	2014-09-30	1286	0			0	0	0	0		1	0	0			2011-03-24	635.623	13	0	33000	4.51851	0	0
2011-10-26	1	1	1	28	6		N	0	0	0	340.378	0	252	2.4014	0	0	2014-07-22	0	0	2014-09-30	1070	0			0	0	0	1		1	0	0			2011-10-26	390.45	8	0	40	1.60206	1	0
2011-05-12	1	0	1	61	13		N	0	0	0	12.9744	1	777000	5.89042	1	0	2014-06-03	0	0	2014-09-30	1237	0			0	1	1	0		1	1	0			2011-05-12	13	1	1	777000	5.89042	0	1
2011-11-02	1	1	1	25	5	1	N	0	0	0	348.034	0	20900	4.32015	0	0		1	2	2014-09-30	1063	0			0	0	0	0		0	0	0			2011-11-02	515.284	11	0	11000	4.04139	0	0
2011-11-20	1	1	1	26	6		N	0	0	0	415.785	0	998	2.99913	0	0	2013-07-11	1	2	2014-09-30	1045	0			0	0	0	1		1	0	0			2011-11-20	339.786	7	0	178	2.25042	0	0
2011-11-17	1	1	1	21	5	1	P	1	1	0	245.565	0	40	1.60206	0	1	2013-11-07	1	2	2014-09-30	1048	0			0	0	0	1		1	0	0			2011-11-17	230.256	5	0	40	1.60206	1	0
2011-12-26	1	1	1	22	5	1	N	0	0	0	438.325	0	278000	5.44404	1	0	2014-05-19	0	0	2014-09-30	1009	0			0	0	0	0		1	0	0			2011-12-26	298.017	6	0	132000	5.12057	0	1
2011-08-01	1	1	1	19	4	1	N	0	0	0	409.487	0	946	2.97589	0	0	2014-07-10	0	0	2014-09-30	1156	0			0	0	0	0	2011-08-09	1	0	0			2011-08-01	271	6	0	755000	5.87795	0	1
2011-03-16	1	1	1	51	11		N	0	0	0	129.576	1	604	2.78104	0	0	2014-06-26	0	0	2014-09-30	1294	1	2010-10-26	141	1	1	1	0		1	1	0			2011-03-16	36	1	1	15200	4.18184	0	0
2011-09-29	1	1	1	59	12		P	1	1	0	1346.47	0	20	1.30103	0	1	2014-06-05	0	0	2014-09-30	1097	0			0	1	0	0	10/13/2011	1	0	0	0		2011-09-29	1346.47	27	0	40	1.60206	1	0
2011-10-03	1	1	1	31	7		N	0	0	0	53	1	1570	3.1959	0	0	2012-04-17	1	2	2014-09-30	1093	0			0	1	1	0	10/3/2011	1	0	0	1	Diffuse large B-cell lymphoma, stage I	2011-10-03	4.536	1	1	224000	5.35025	0	1
2011-10-13	1	1	1	30	6		N	0	0	0	44.982	1	215000	5.33244	1	0	2014-07-08	0	0	2014-09-30	1083	0			0	1	0	0	10/25/2011	1	0	0	0		2011-10-13	50.3712	1	1	215000	5.33244	0	1
2011-10-20	1	1	1	26	6	1	N	0	0	0	523.83	0	286000	5.45637	1	0	2014-05-27	0	0	2014-09-30	1076	0			0	1	0	0		1	0	0	0		2011-10-20	523.83	11	0	286000	5.45637	0	1
2011-10-26	1	1	1	27	6		N	0	0	0	404.58	0	19100	4.28103	0	0	2014-07-09	0	0	2014-09-30	1070	0			0	0	0	0		1	0	0	0		2011-10-26	485.872	10	0	16700	4.22272	0	0
2011-11-02	1	1	1	23	5		N	0	0	0	233	0	40	1.60206	0	1	2011-11-10	1	2	2014-09-30	1063	0			0	1	0	0		1	0	0	0		2011-11-02	233.037	5	0	40	1.60206	1	0
2011-11-24	1	1	1	34	7		N	0	0	0	211.52	0	40	1.60206	0	1	2014-06-12	0	0	2014-09-30	1041	0			0	0	0	1		1	0	0	0		2011-11-24	241.74	5	0	40	1.60206	1	0
2011-11-09	1	1	1	37	8		N	0	0	0	31	1	229000	5.35984	1	0	2014-06-10	0	0	2014-09-30	1056	0			0	0	1	1		1	0	0	1	Anterior mediastinal DLBCL, stage IB	2011-11-09	29.6725	1	1	986	2.99388	0	0
2011-11-10	1	1	1	22	5	1	N	0	0	0	714.692	0	22200	4.34635	0	0	2014-05-08	0	0	2014-09-30	1055	0			0	0	0	0		1	0	0	0		2011-11-10	714.692	15	0	22200	4.34635	0	0
2011-11-10	1	1	1	26	6	2	N	0	0	0	19.5896	1	183000	5.26245	1	0	2014-05-22	0	0	2014-09-30	1055	0			0	0	0	0	11/10/2011	1	0	0	0		2011-11-10	19.5896	1	1	183000	5.26245	0	1
2011-11-14	1	1	1	36	8		N	0	0	0	23	1	7130	3.85309	0	0	2014-04-29	0	0	2014-09-30	1051	0			0	0	1	0	11/11/2011	1	1	0	0		2011-11-14	49.5677	1	1	7130	3.85309	0	0
2011-12-08	1	1	1	35	7		N	0	0	0	101.976	1	26000	4.41497	0	0	2014-05-15	0	0	2014-09-30	1027	0			0	1	1	0	12/15/2011	1	0	0	1	Cryptococcal pneumonia	2011-12-08	163.142	4	1	26000	4.41497	0	0
2011-11-17	1	1	1	29	6		N	0	0	0	262.08	0	795000	5.90037	1	0	2014-05-29	0	0	2014-09-30	1048	0			0	1	0	0		1	0	0	0		2011-11-17	262.08	6	0	795000	5.90037	0	1
2011-12-05	1	1	1	40	8		N	0	0	0	185	1	58000	4.76343	0	0	2014-05-20	0	0	2014-09-30	1030	0			0	0	1	1	11/28/2011	1	0	0	1	Cryptococcal meningitis	2011-12-05	123.778	3	1
2011-12-21	1	1	1	43	9		N	0	0	0	13	1	14800	4.17026	0	0	2014-07-08	0	0	2014-09-30	1014	0			0	1	1	0	12/30/2011	1	1	0	0		2011-12-21	13.2904	1	1	14800	4.17026	0	0
2011-05-31	1	1	1	39	8		N	0	0	0	70	1	2900	3.4624	0	0	2011-07-17	0	1	2014-09-30	47	0			0	1	1	0		1	1	0	1	IPA	2011-05-31	81.78	2	1	133000	5.12385	0	1
